# Supplementary material for: Synthesis and structural studies of Cu(i) methylthiosalicylate complexes and their catalytic application in thiol-yne click reaction
Source: Royal Society of Chemistry journal article supplement (doi:10.1039/d2nj02722d), 2022-01-01
Supplement: d2nj02722d1.pdf [file d2nj02722d1.pdf]

## Supporting Information

### **Synthesis and Structural Studies of Cu(I) Methylthiosalicylate Complexes and their Catalytic Application in Thiol-Yne Click Reaction**

Krishna Kumar<sup>1</sup>, Priyanka Tiwari<sup>1</sup>, Rajni Kant<sup>2</sup>, Subrato Bhattacharya<sup>1\*</sup>

<sup>1</sup>Department of Chemistry, Institute of Science, Banaras Hindu University, Varanasi-221005,  
India

<sup>2</sup>Department of Physics, University of Jammu, Jammu and Kashmir – 180006, India

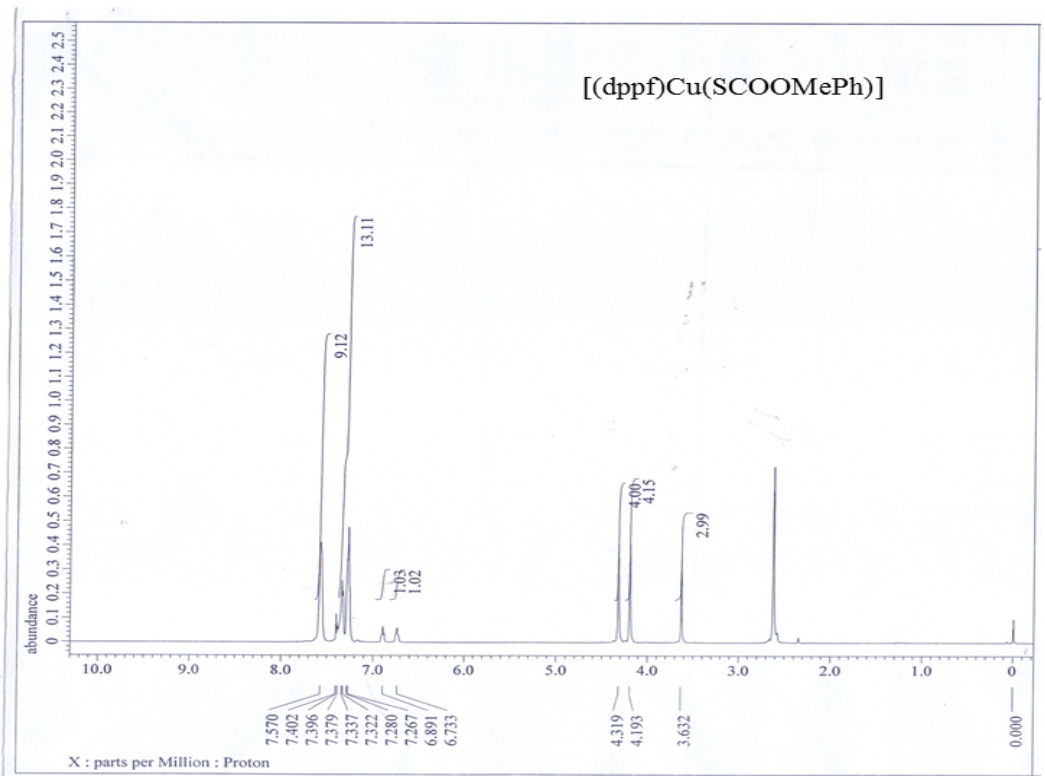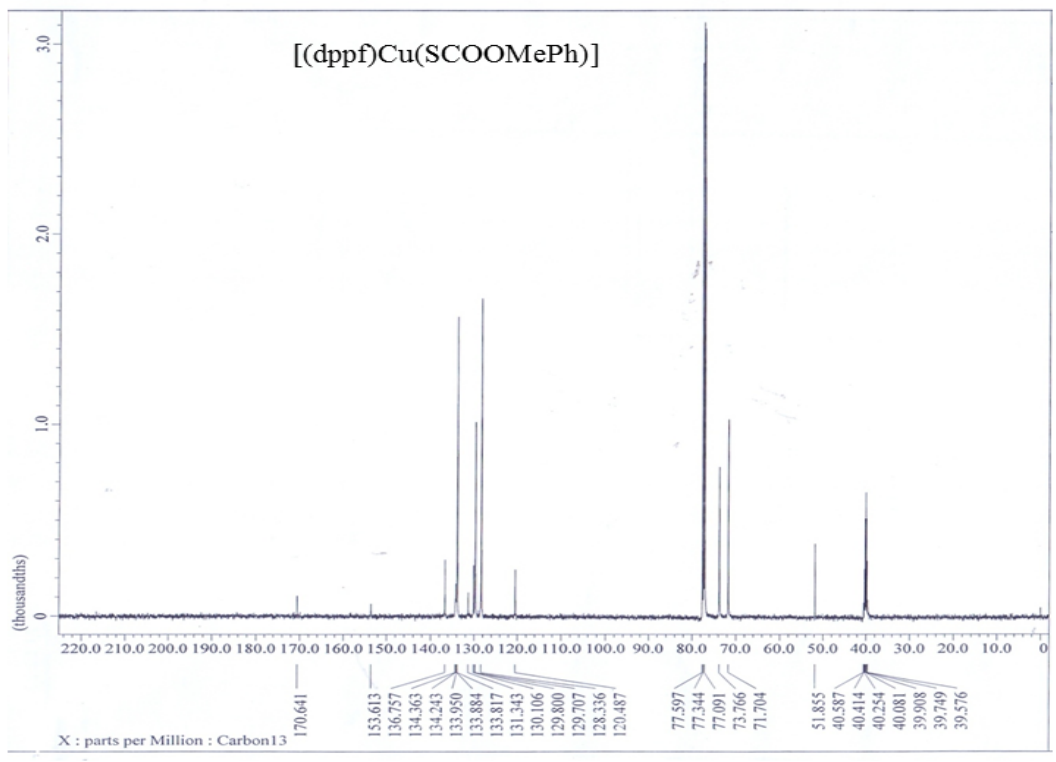

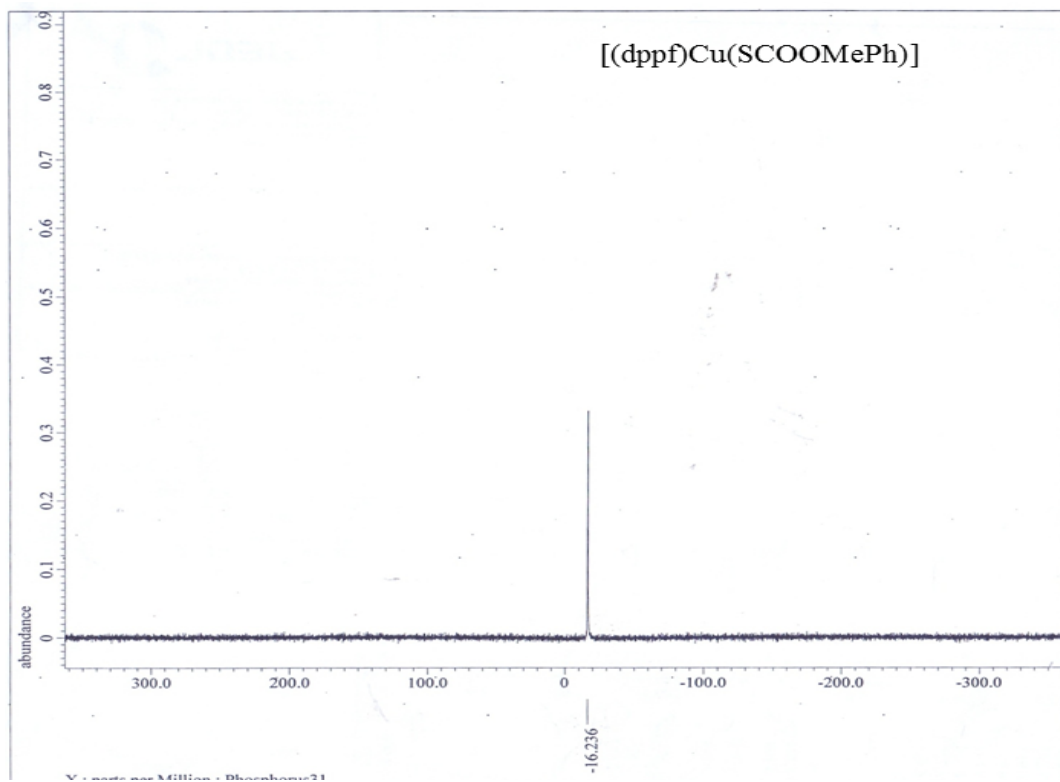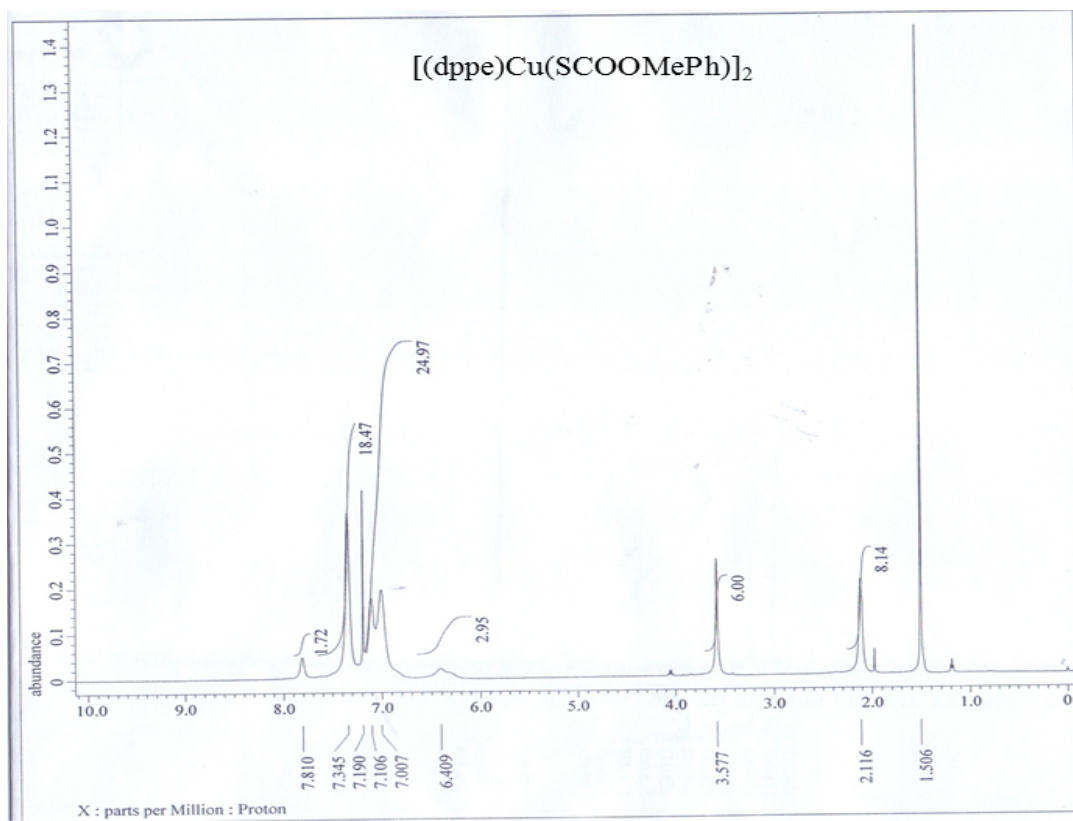

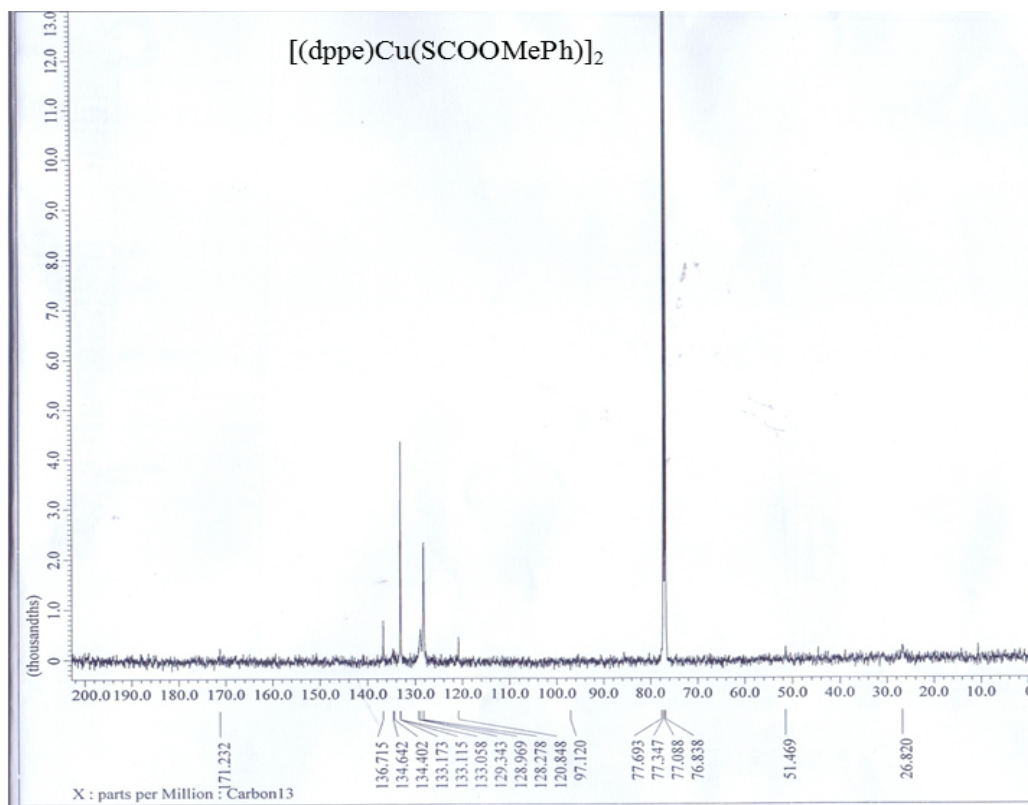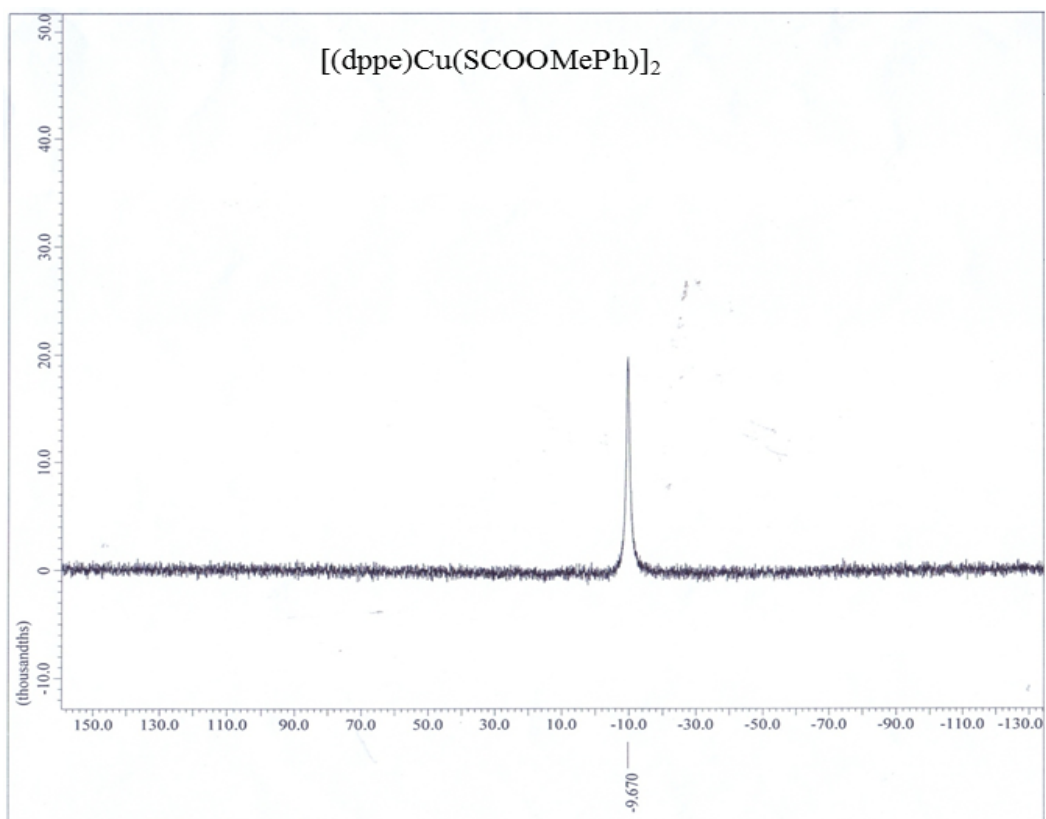

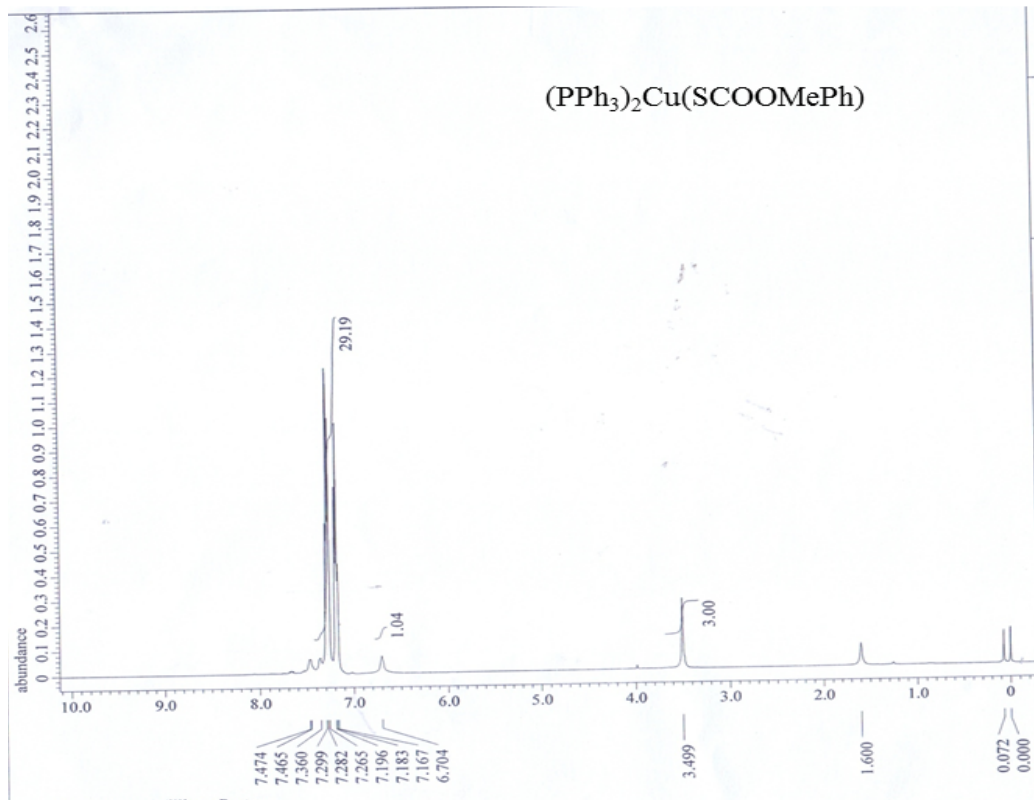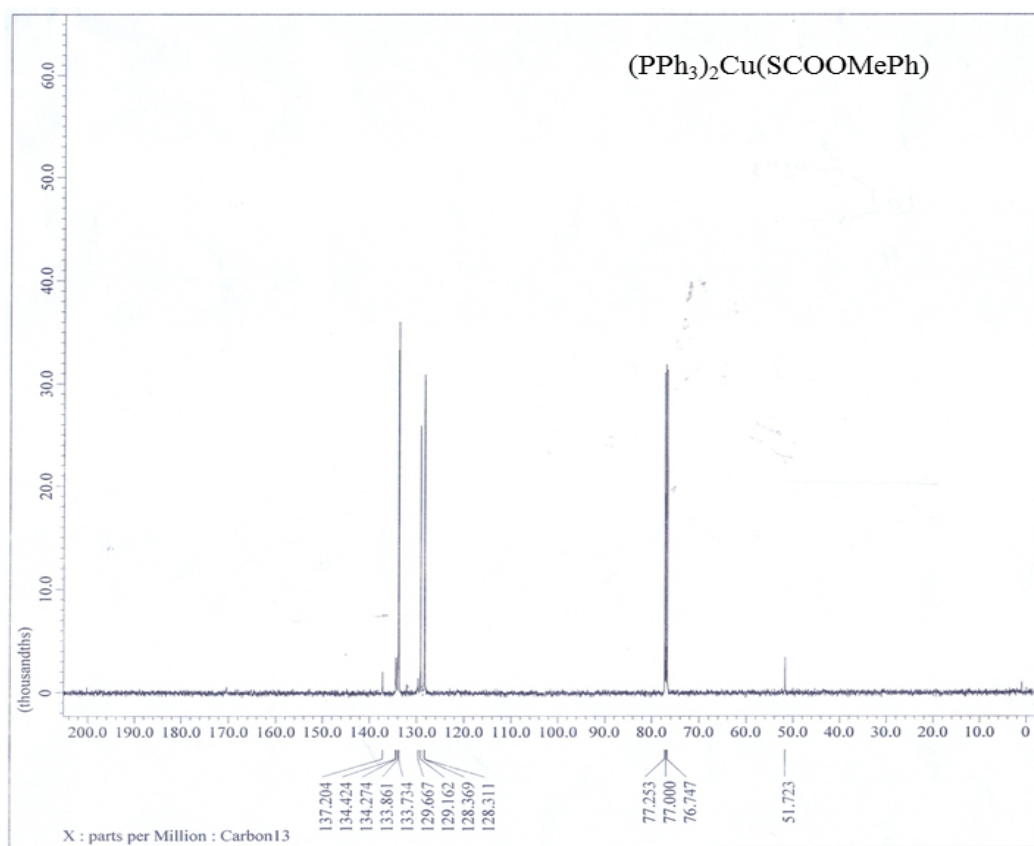

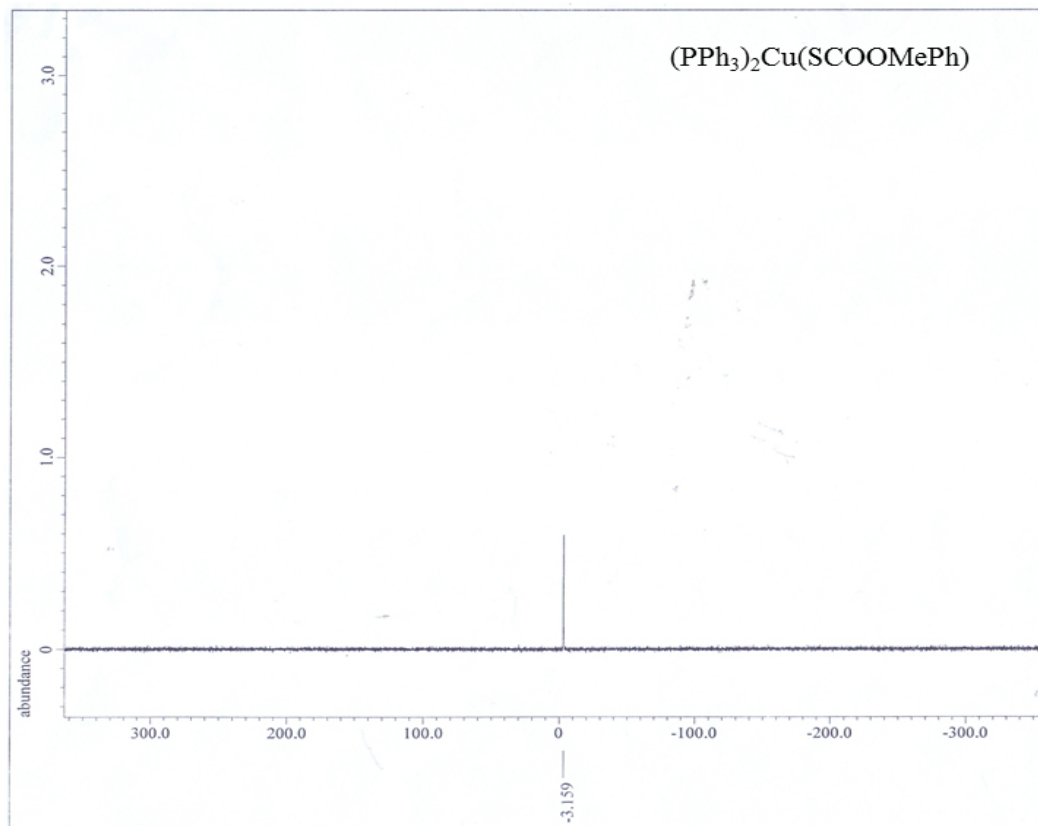

**Figure SI 1.** Scanned  $^1\text{H}$ ,  $^{13}\text{C}$ , and  $^{31}\text{P}$ -NMR spectra of **1**, **2**, and **3** respectively.

### Mass Spectrum of [Phenyl(styryl)sulfane] with catalyst 1

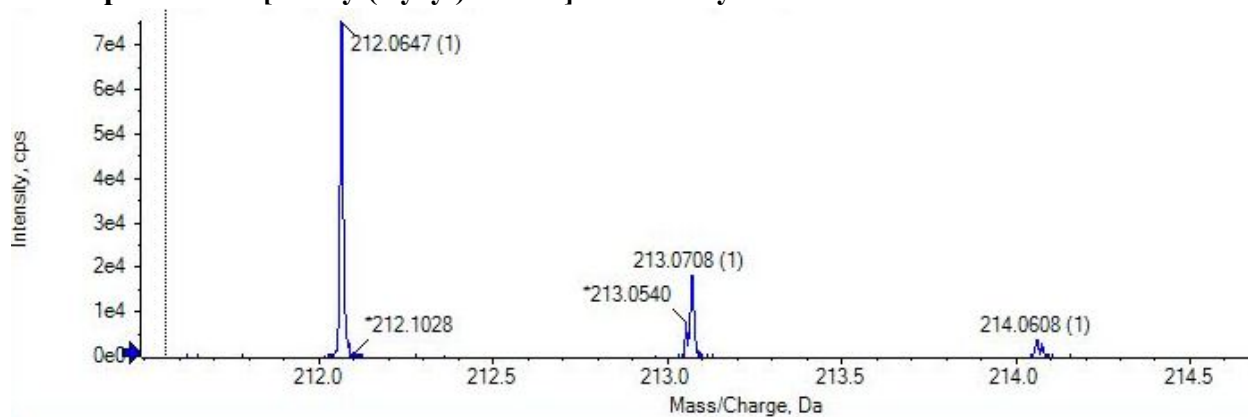

**Figure SI 2.** Mass Spectrum of [Phenyl(styryl)sulfane].

**HPLC data of [Phenyl(styryl)sulfane] with catalyst 1.**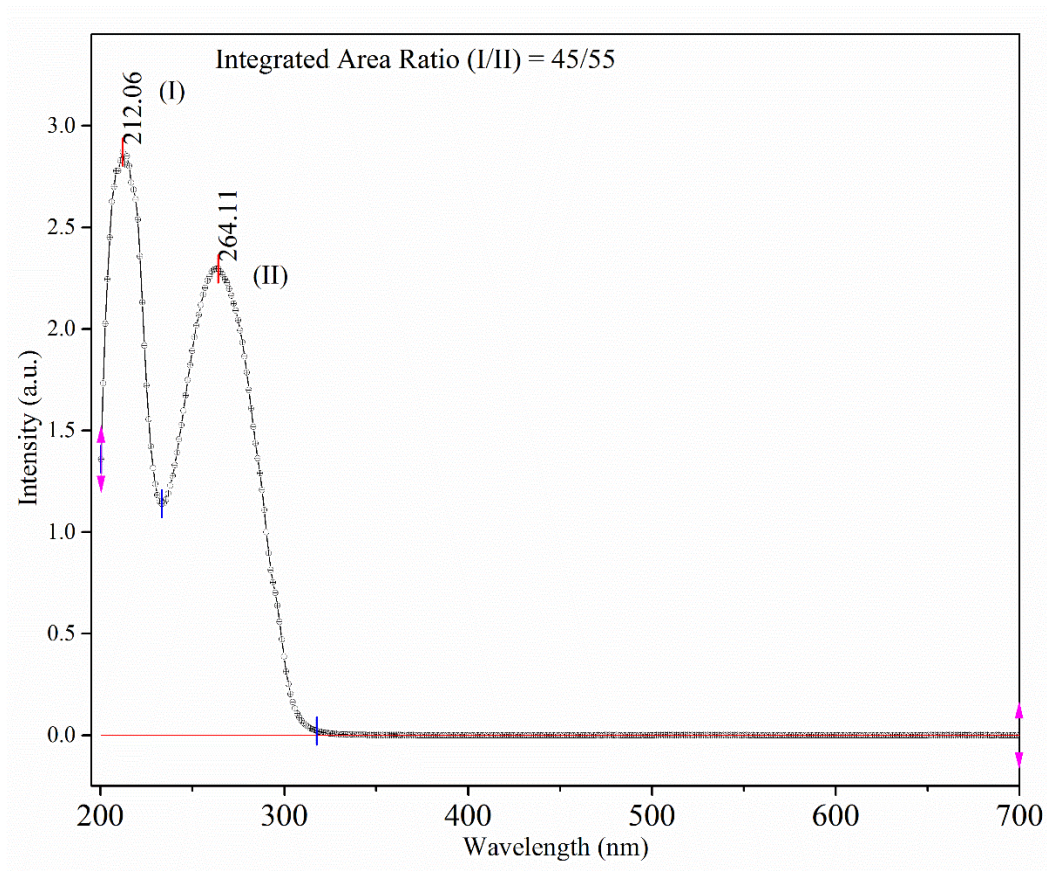**Figure SI 3.** HPLC graph of [Phenyl(styryl)sulfane].

## Hirshfeld Surface Analysis

Hirshfeld surface for the complexes **1-3**, mapped over  $d_{\text{norm}}$ , shape index and curvedness are shown in Figure SI 4.

| <b>d norm</b>                                                                       | <b>Shape index</b>                                                                  | <b>Curvedness</b>                                                                     |
|-------------------------------------------------------------------------------------|-------------------------------------------------------------------------------------|---------------------------------------------------------------------------------------|
| 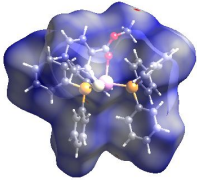   |    |    |
| <b>1 (a)</b>                                                                        | <b>1 (b)</b>                                                                        | <b>1 (c)</b>                                                                          |
|    |    |    |
| <b>2 (a)</b>                                                                        | <b>2 (b)</b>                                                                        | <b>2 (c)</b>                                                                          |
|  |  |  |
| <b>3 (a)</b>                                                                        | <b>3 (b)</b>                                                                        | <b>3 (c)</b>                                                                          |

**Figure SI 4.**  $d_{\text{norm}}$ , shape index and curvedness of complex **1-3**.

Percentage contributions of various types of intermolecular interaction in fingerprints such as  $\text{H}\cdots\text{H}$ ,  $\text{C}\cdots\text{H}$ ,  $\text{S}\cdots\text{H}$ ,  $\text{O}\cdots\text{H}$  and  $\text{C}\cdots\text{C}$ , are shown as a bar graph (Figure SI 5). The 2D fingerprint plot presented in Figure SI 5, provides a summary of each combination of  $d_e$  and  $d_i$  across the surface of the molecule.



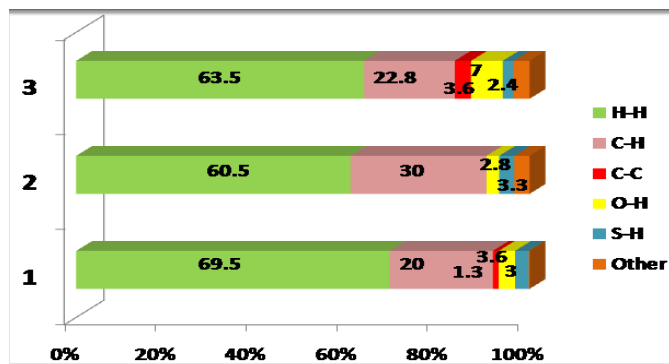

Figure S15 . Relative contributions of various intermolecular contacts to the Hirshfeld surface area in complex 1-3.

### Hirshfeld 2D fingerprint plot of 1 and 2.

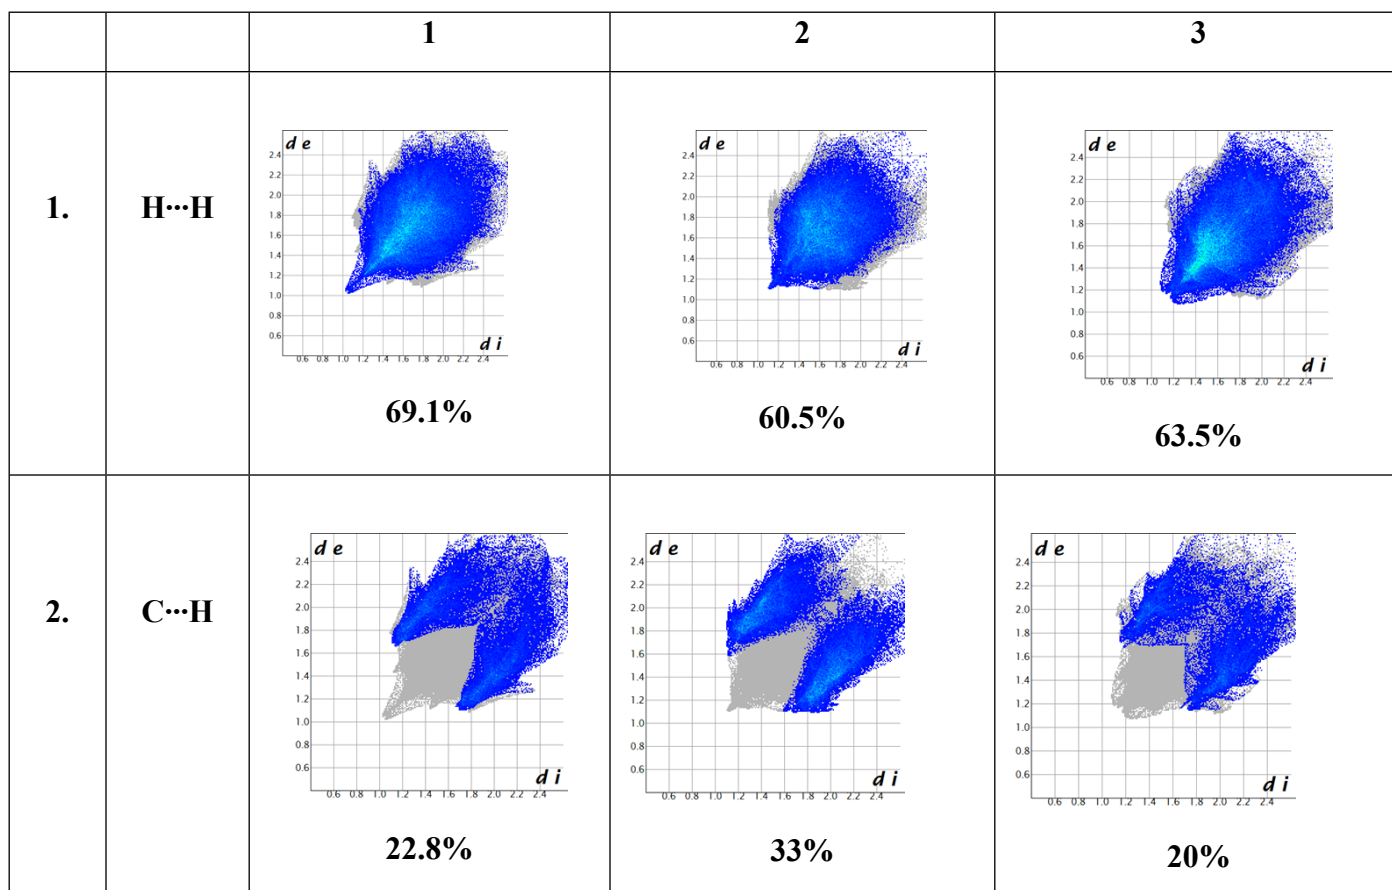

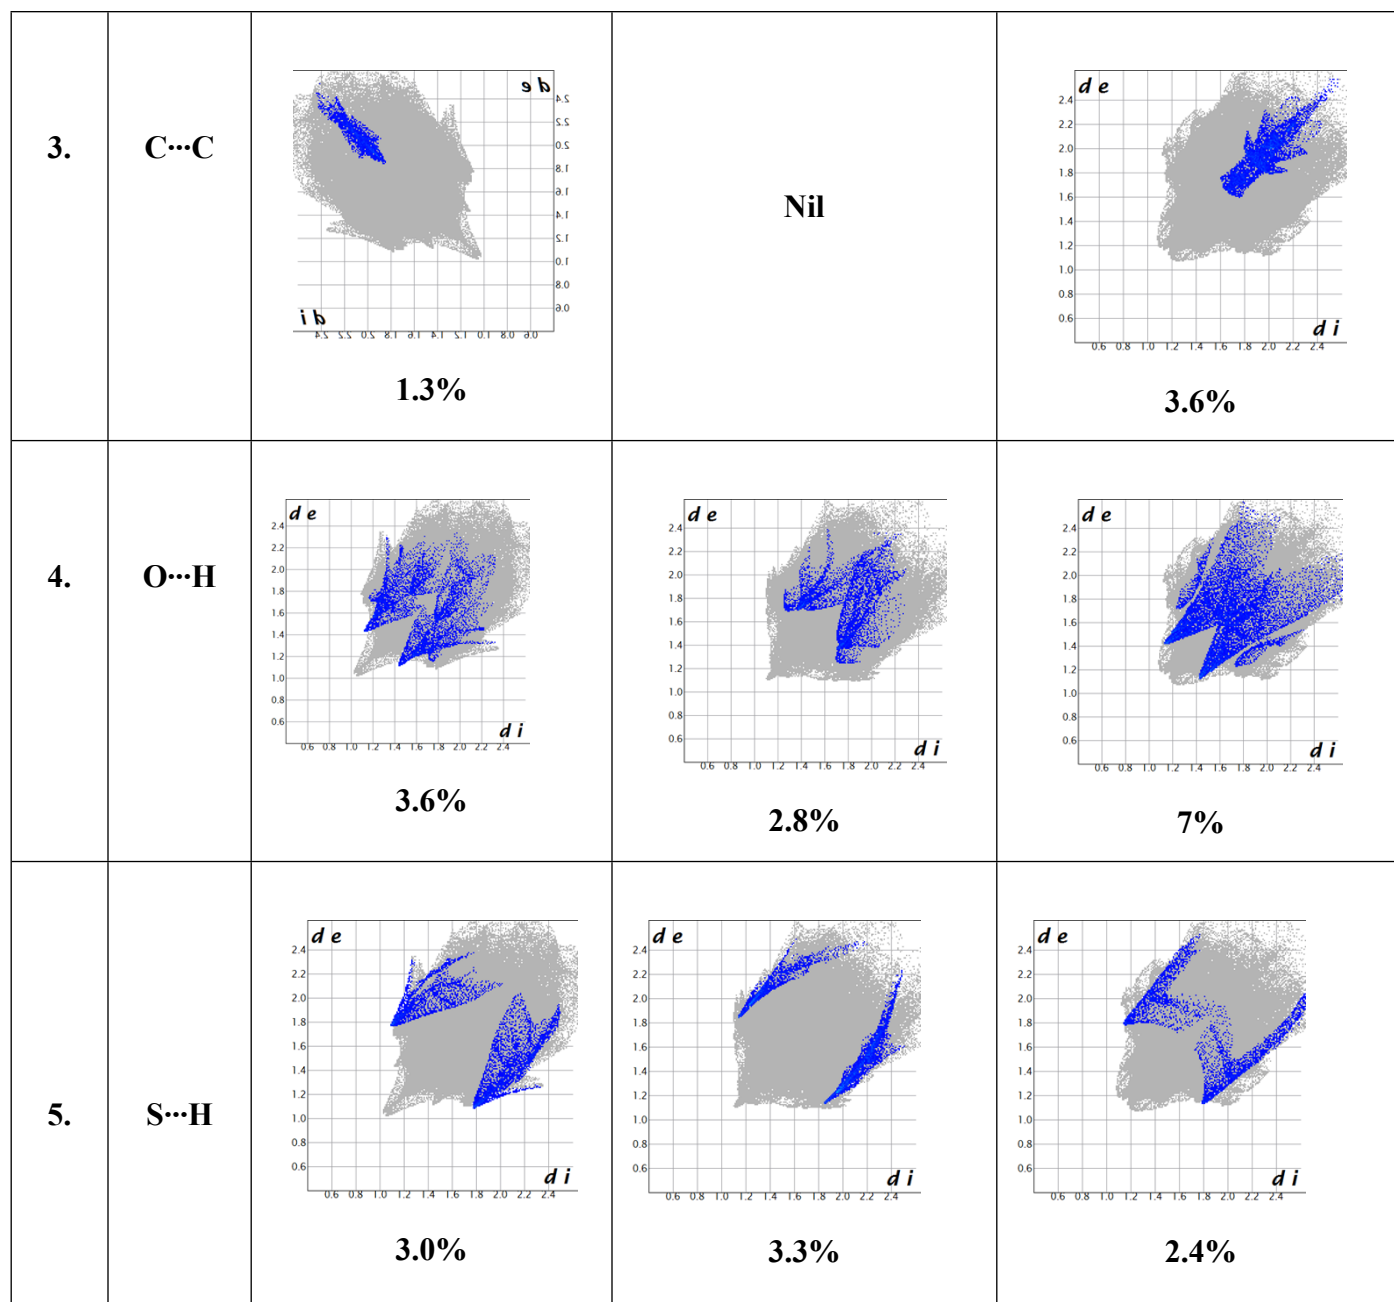

Figure SI 6. The Hirshfeld 2D fingerprint plots of **1**, **2** and **3**.

NMR spectra of catalyzed product:

(1) Phenyl(styryl)sulfane:  $^1H$  and  $^{13}C$

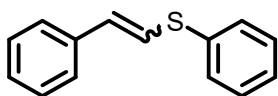

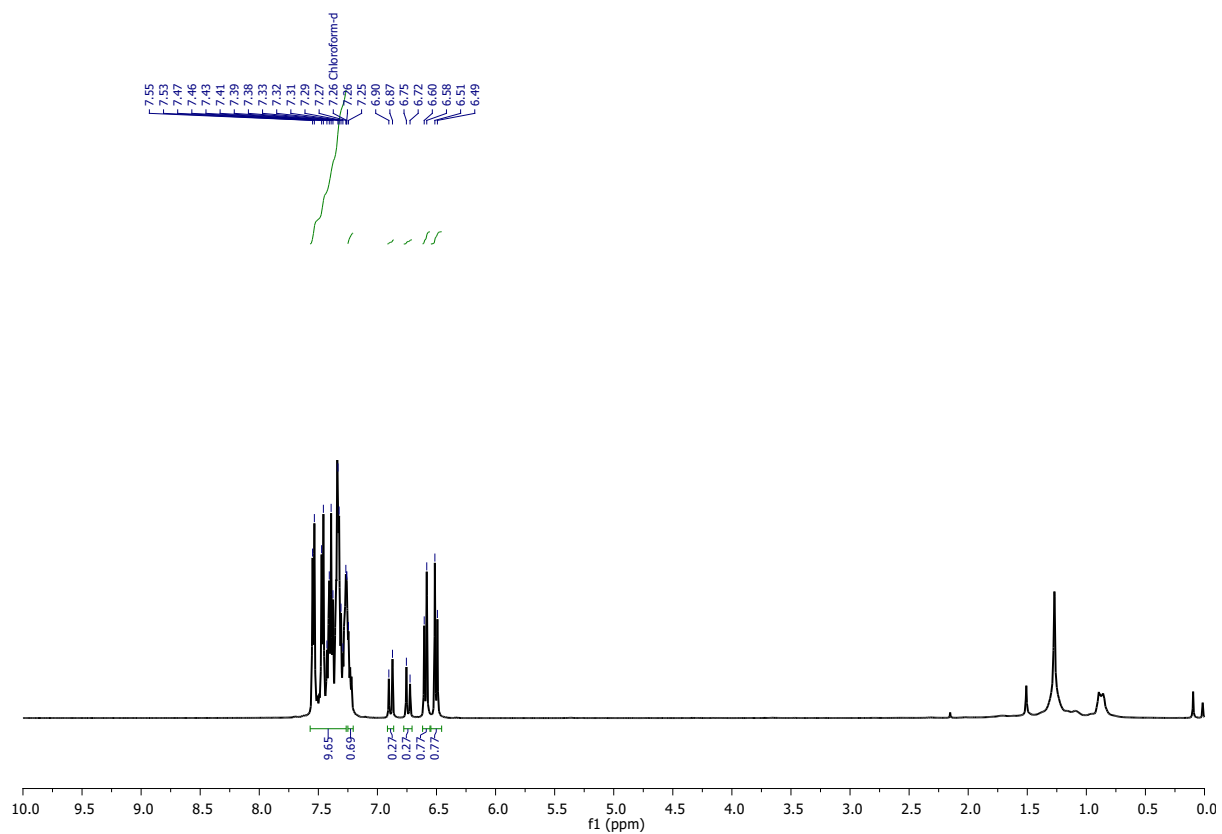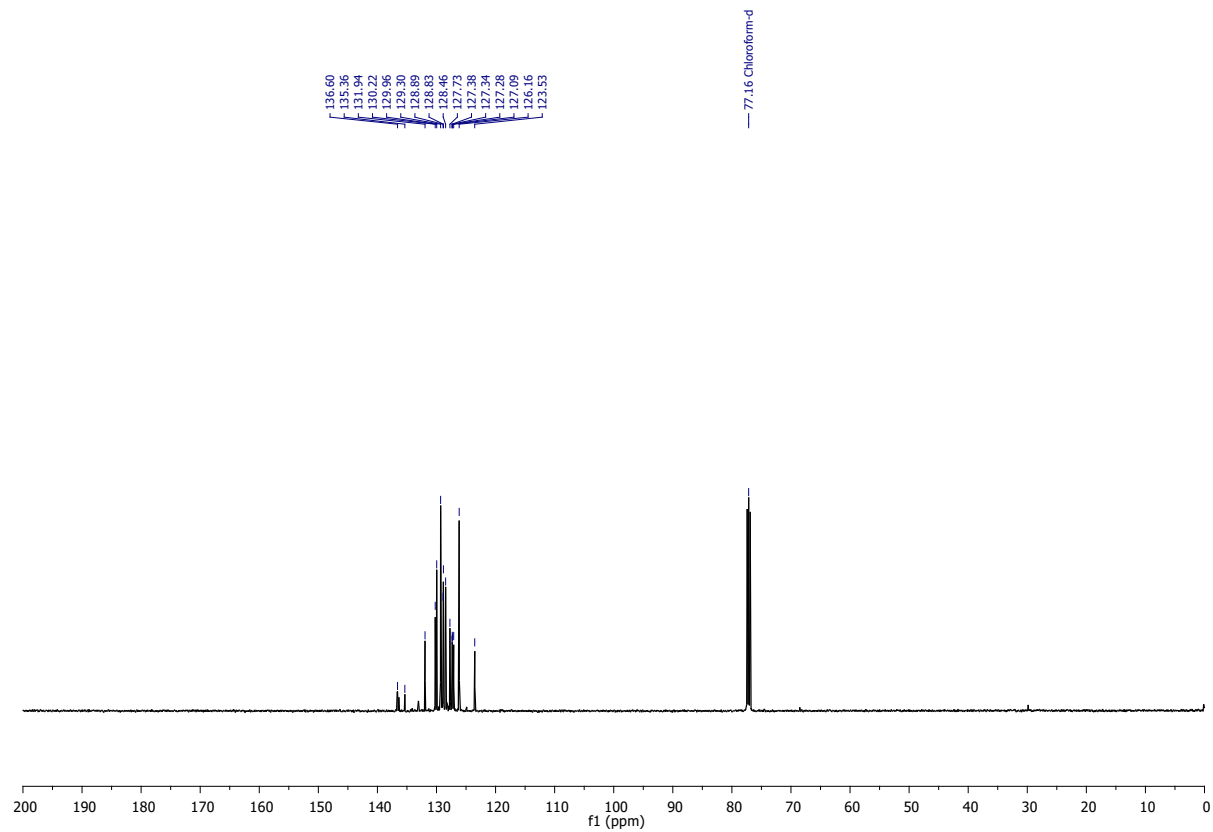

**(2) Styryl(*P*-tolyl)sulfane:  $^1\text{H}$  and  $^{13}\text{C}$** 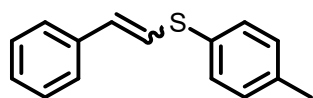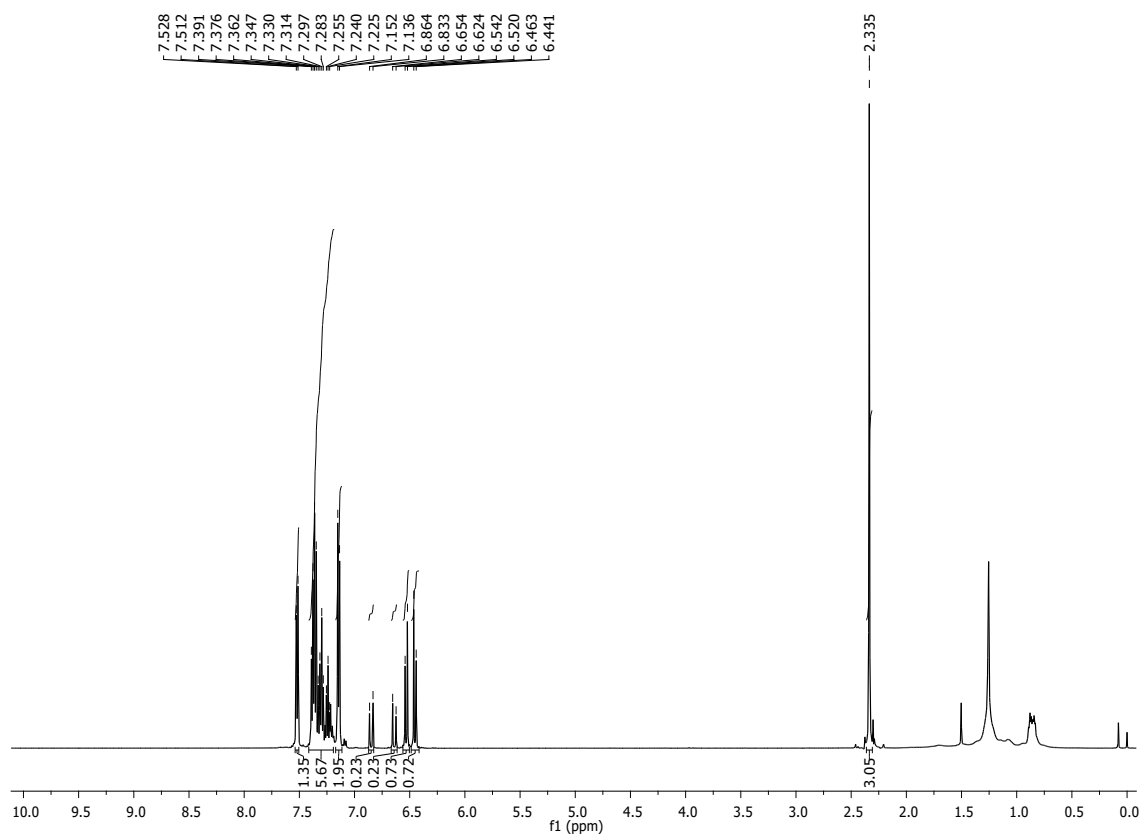

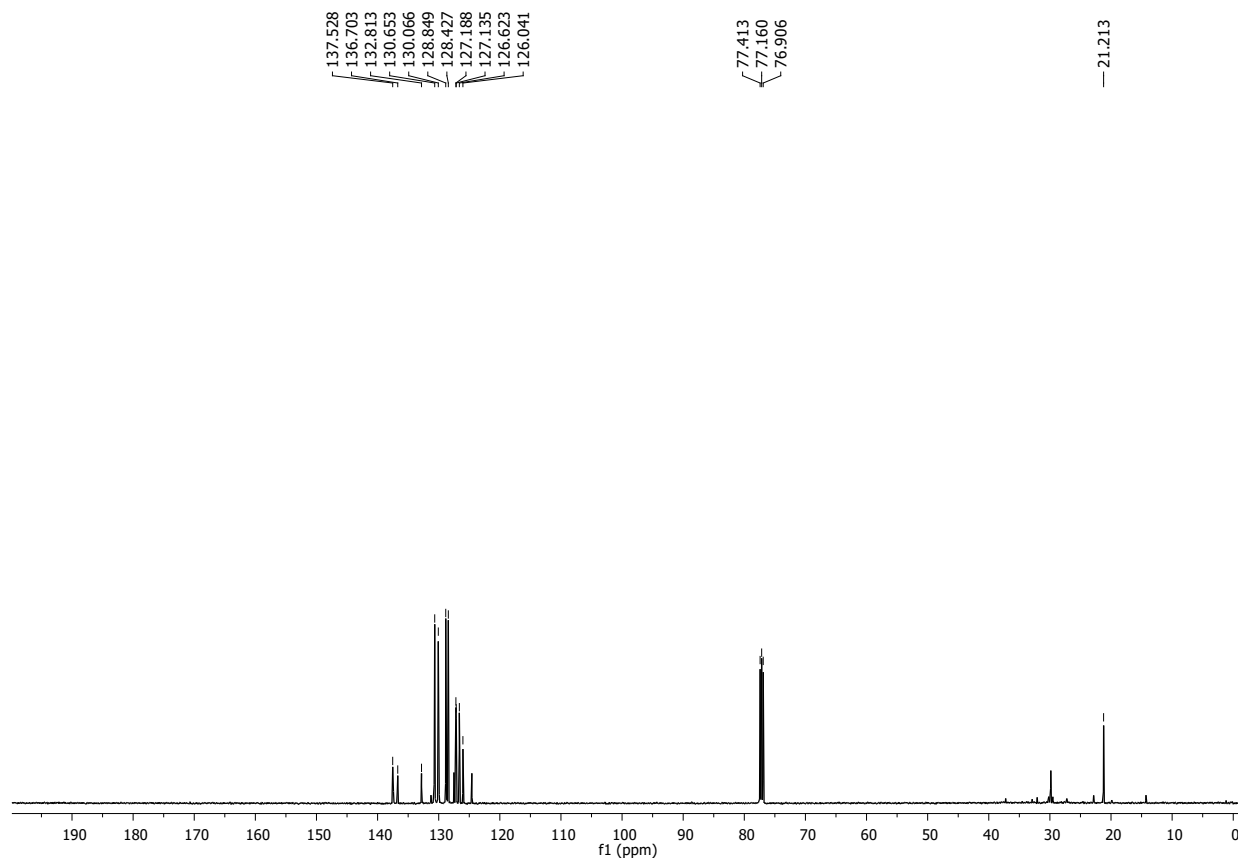

**(3) (4-methoxyphenyl)(styryl)sulfane:**

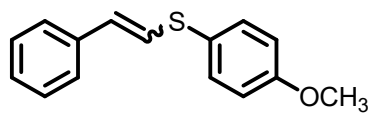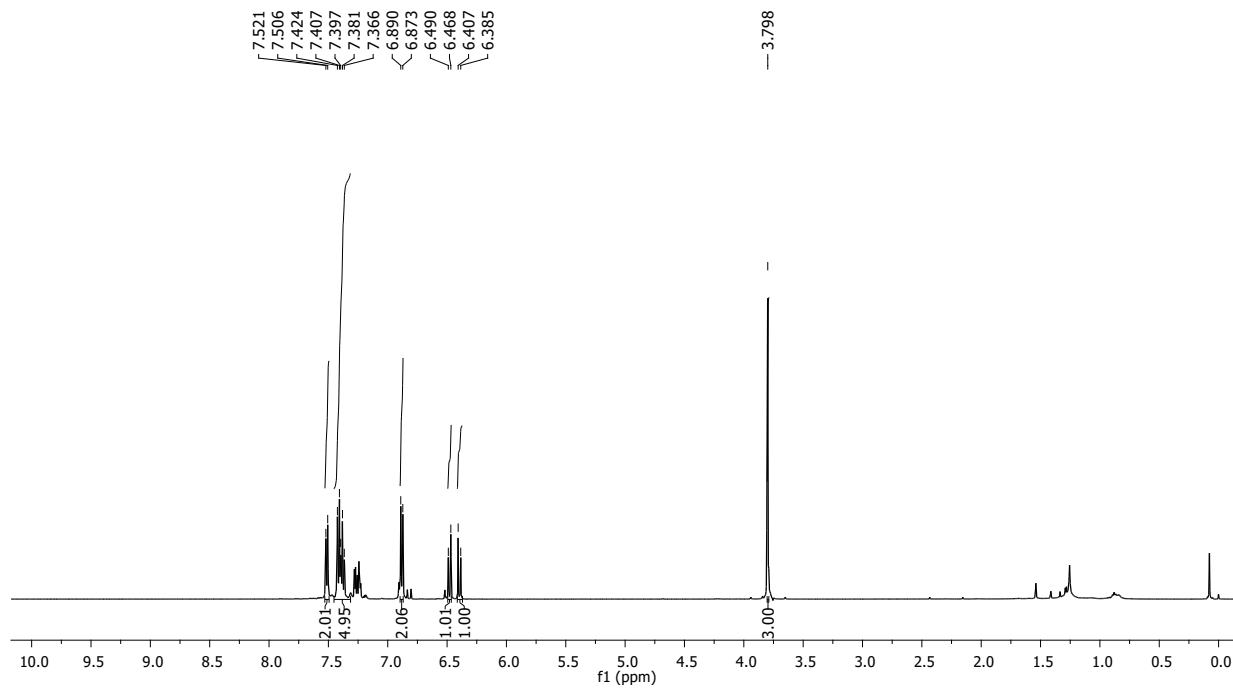

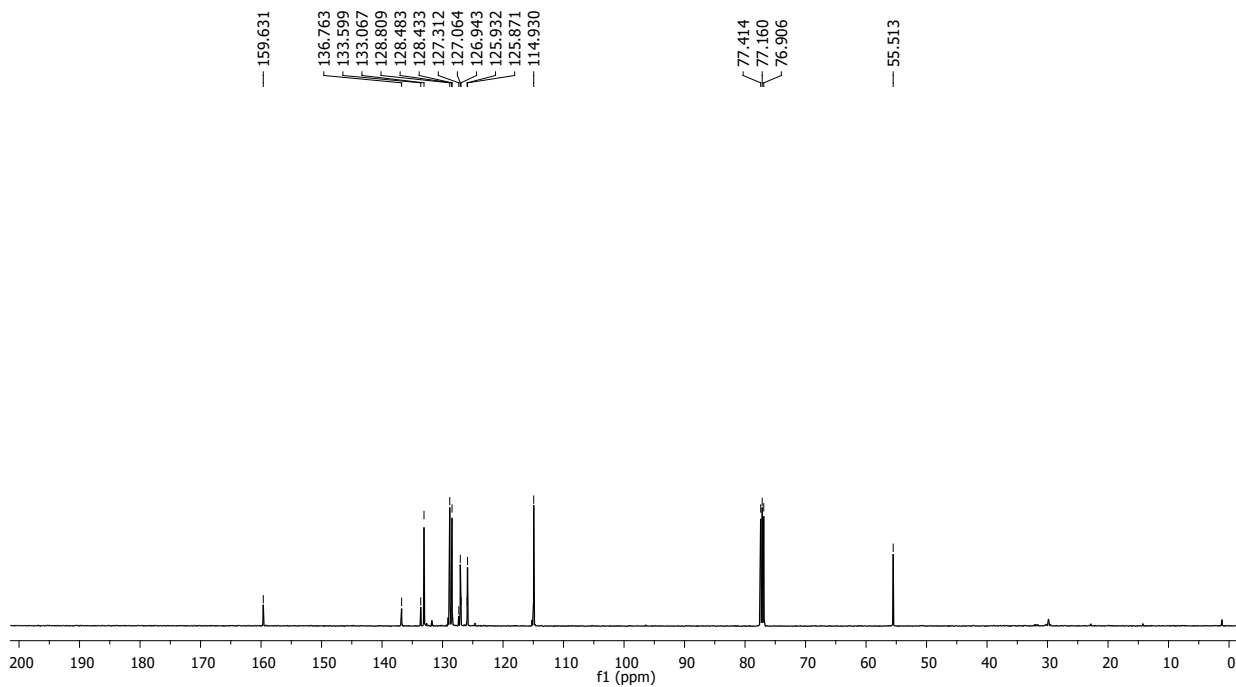

(4) (4-methylstyryl)(phenyl)sulfane:

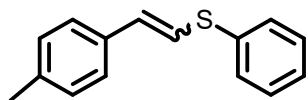

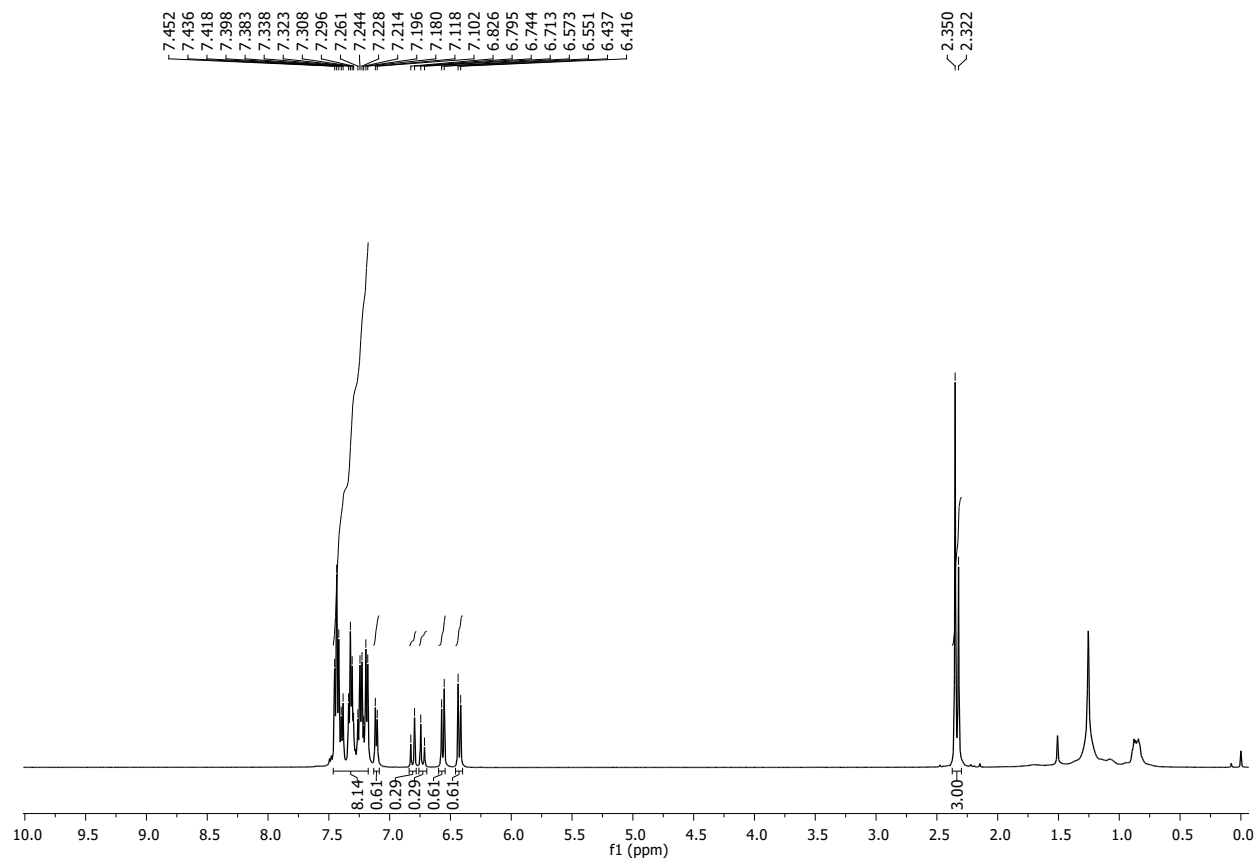

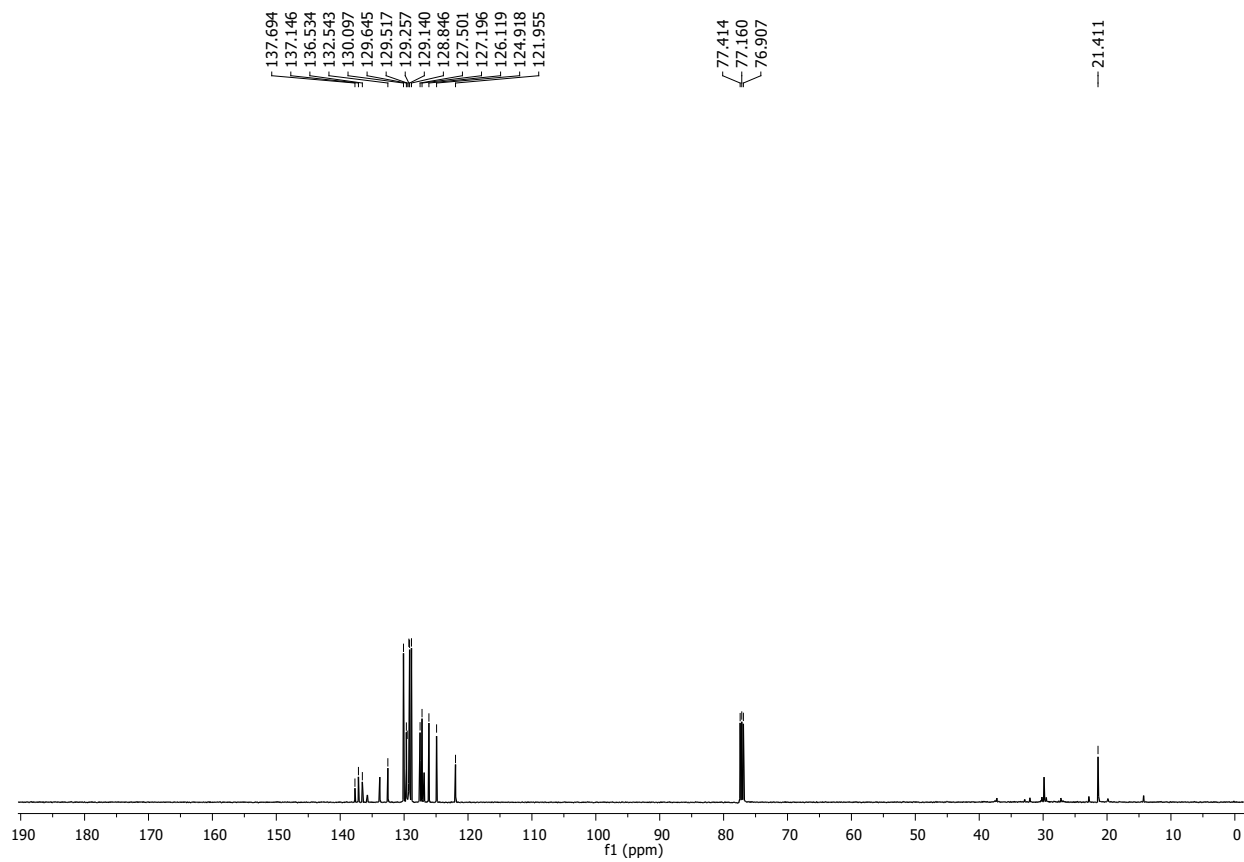

**(5) (4-methoxyphenyl)(4-methylstyryl)sulfane:**

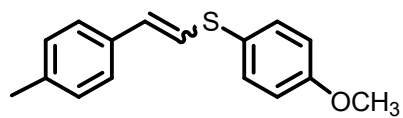



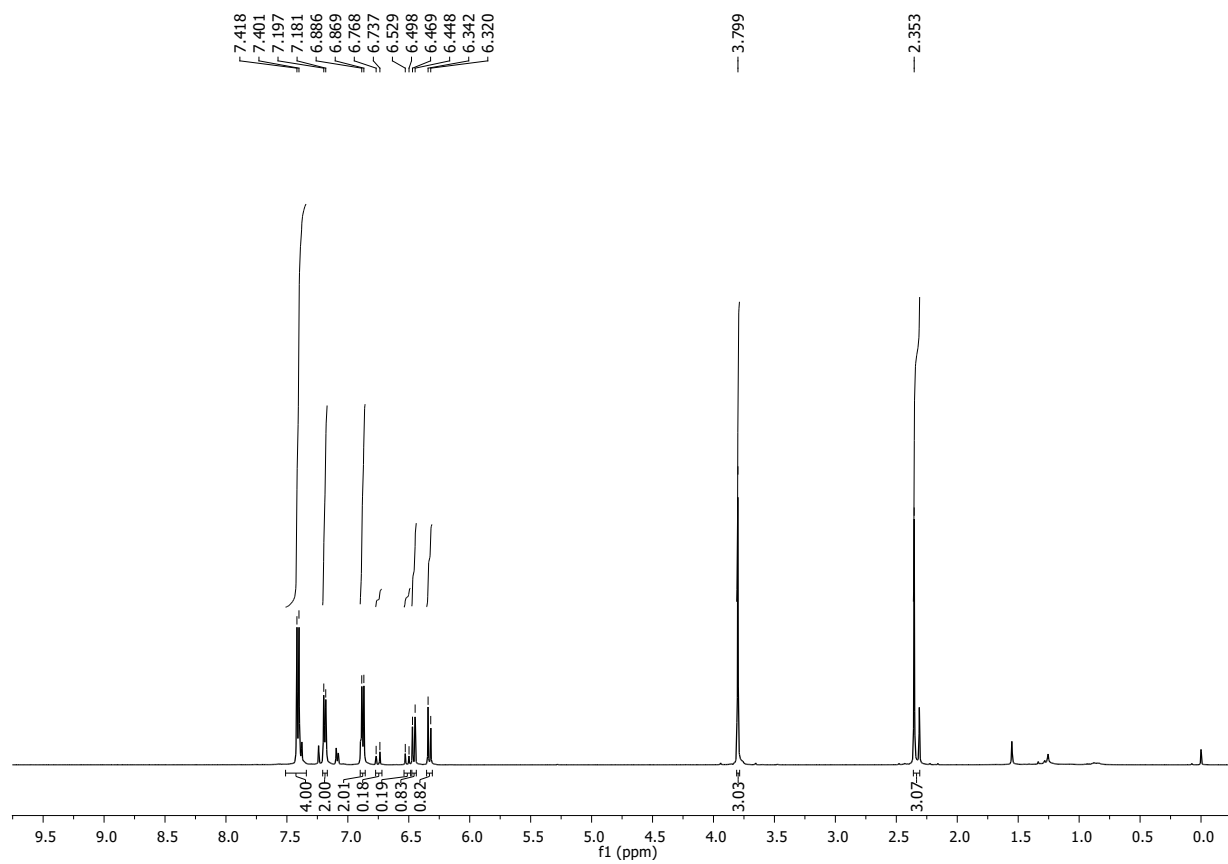

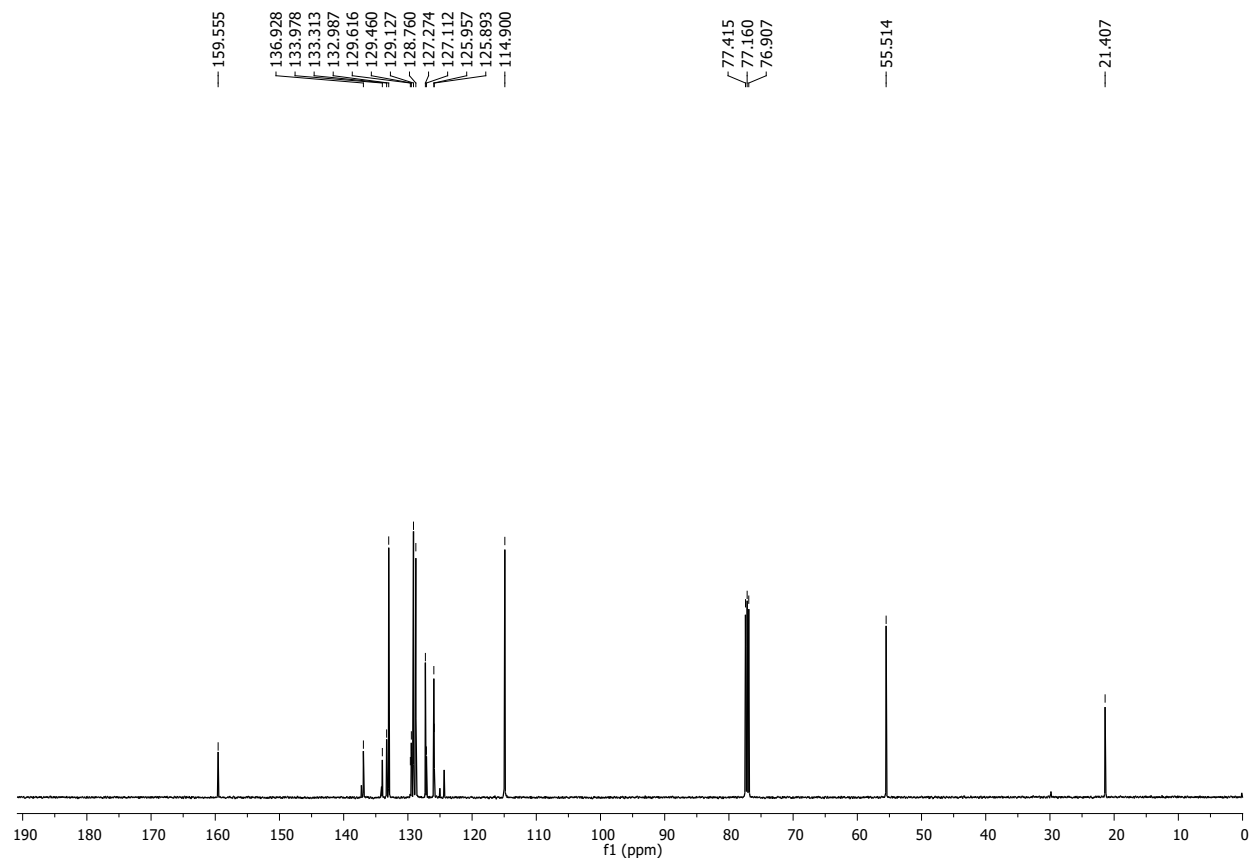

(6) (4-methylstyryl)(*p*-tolyl)sulfane:

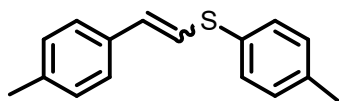

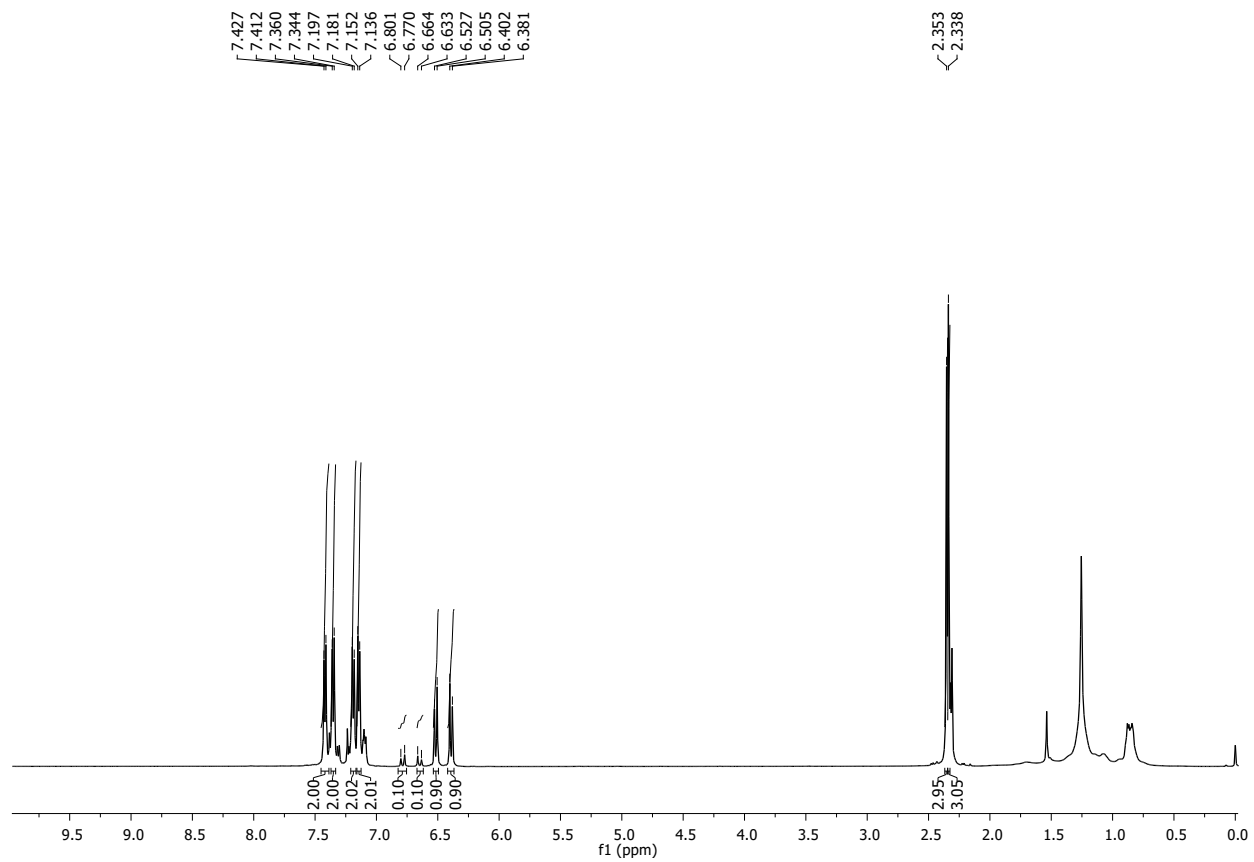

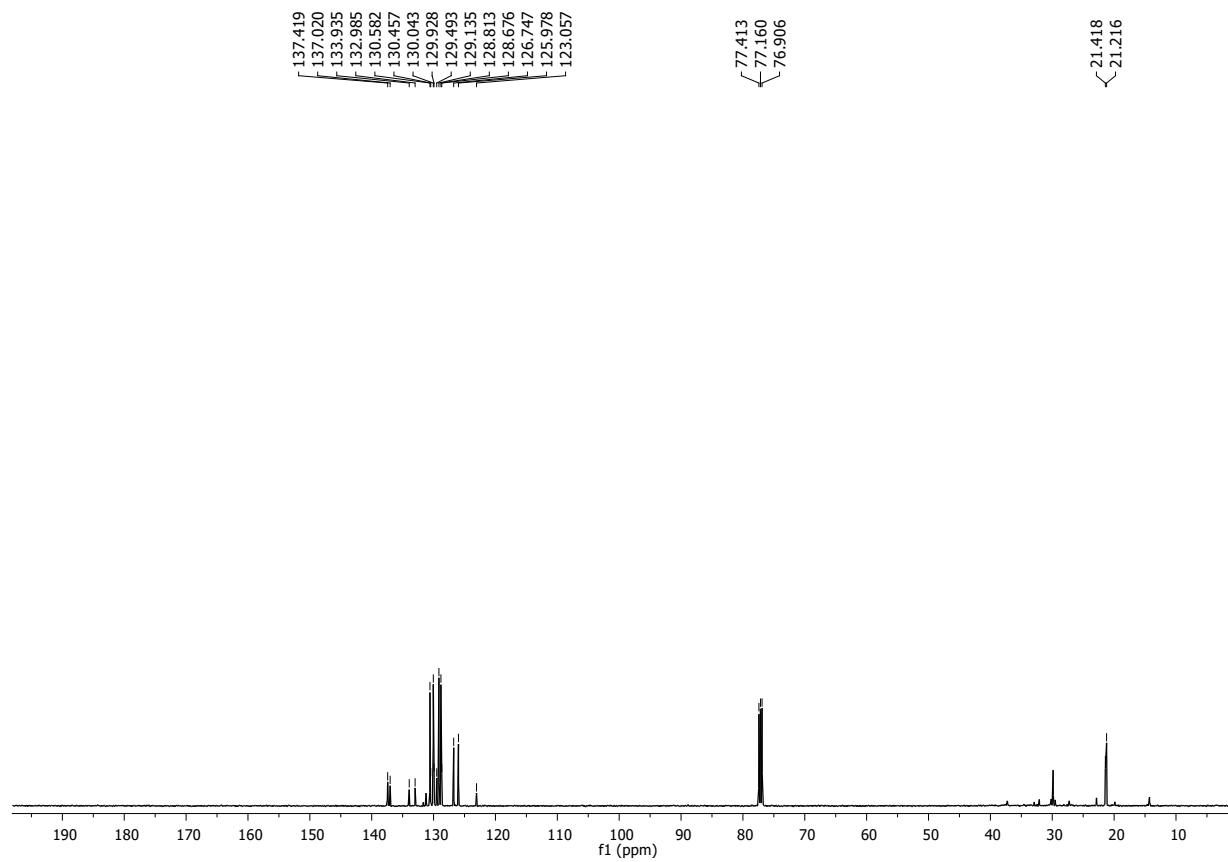

**(7) Propyl(styryl)sulfane:**

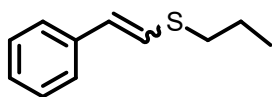

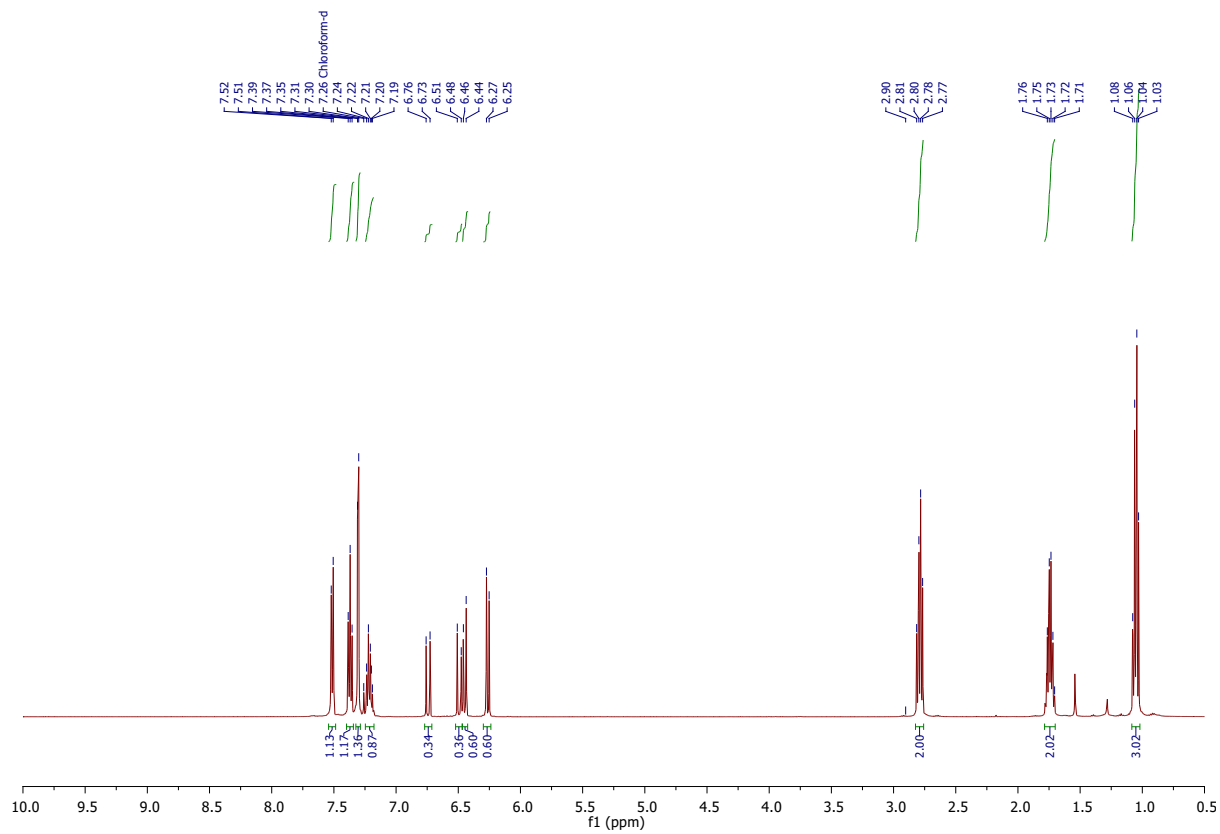

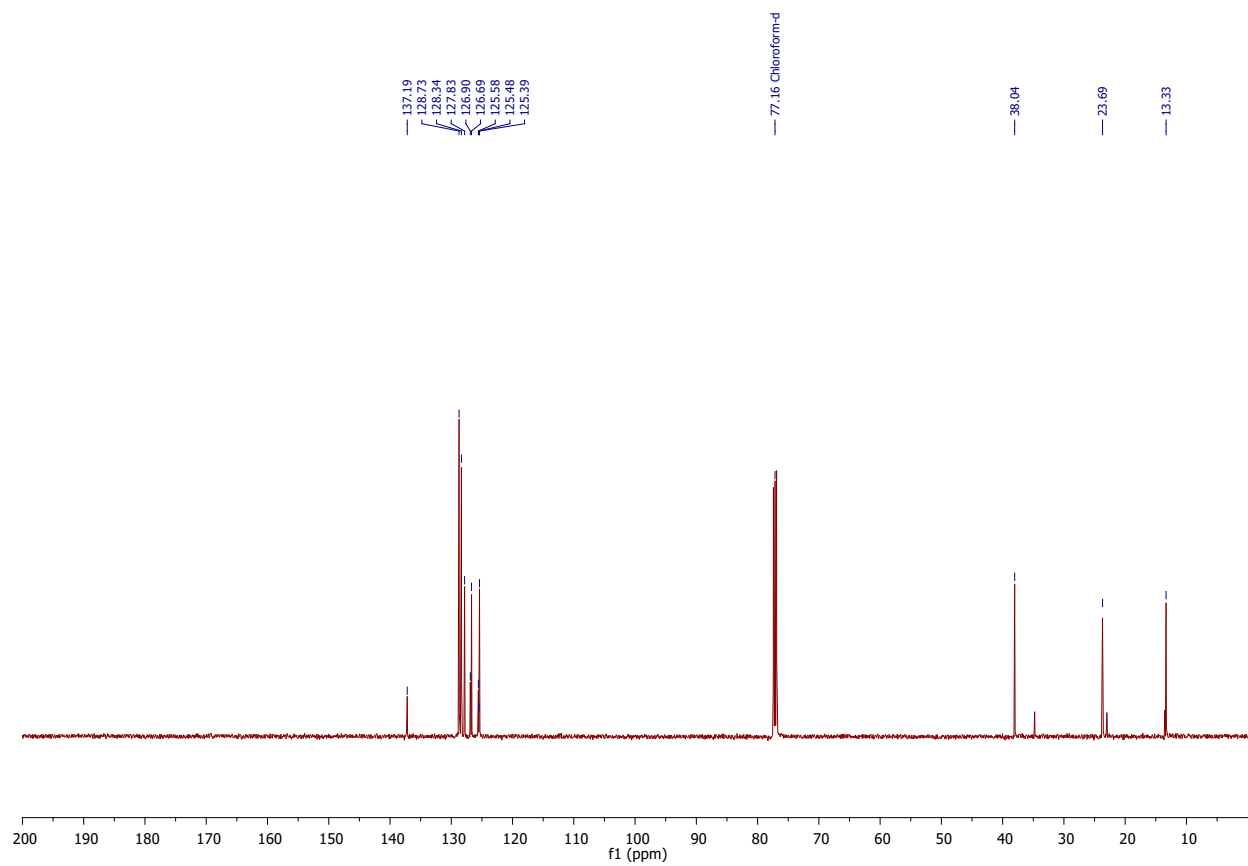

**(8) (4-chlorophenyl)(styryl)sulfane:**

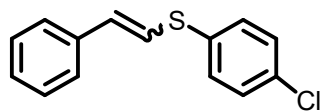

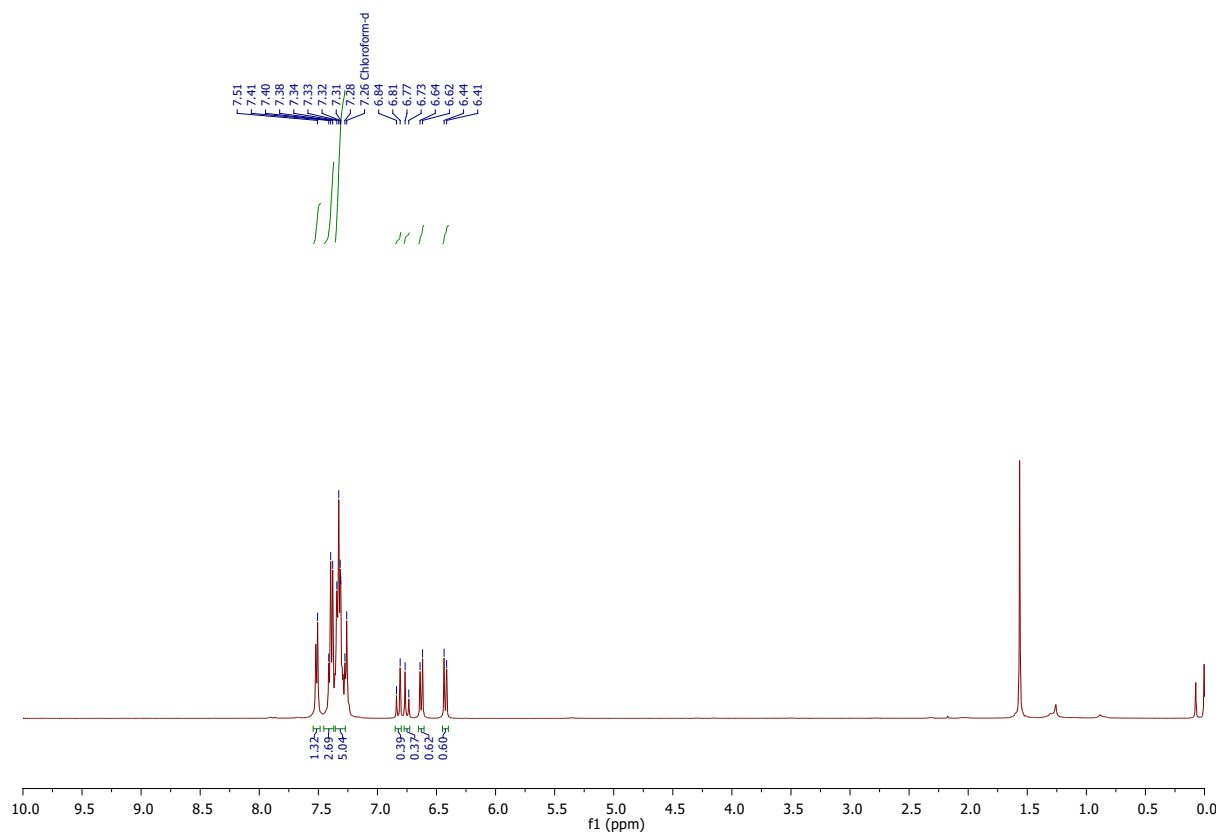

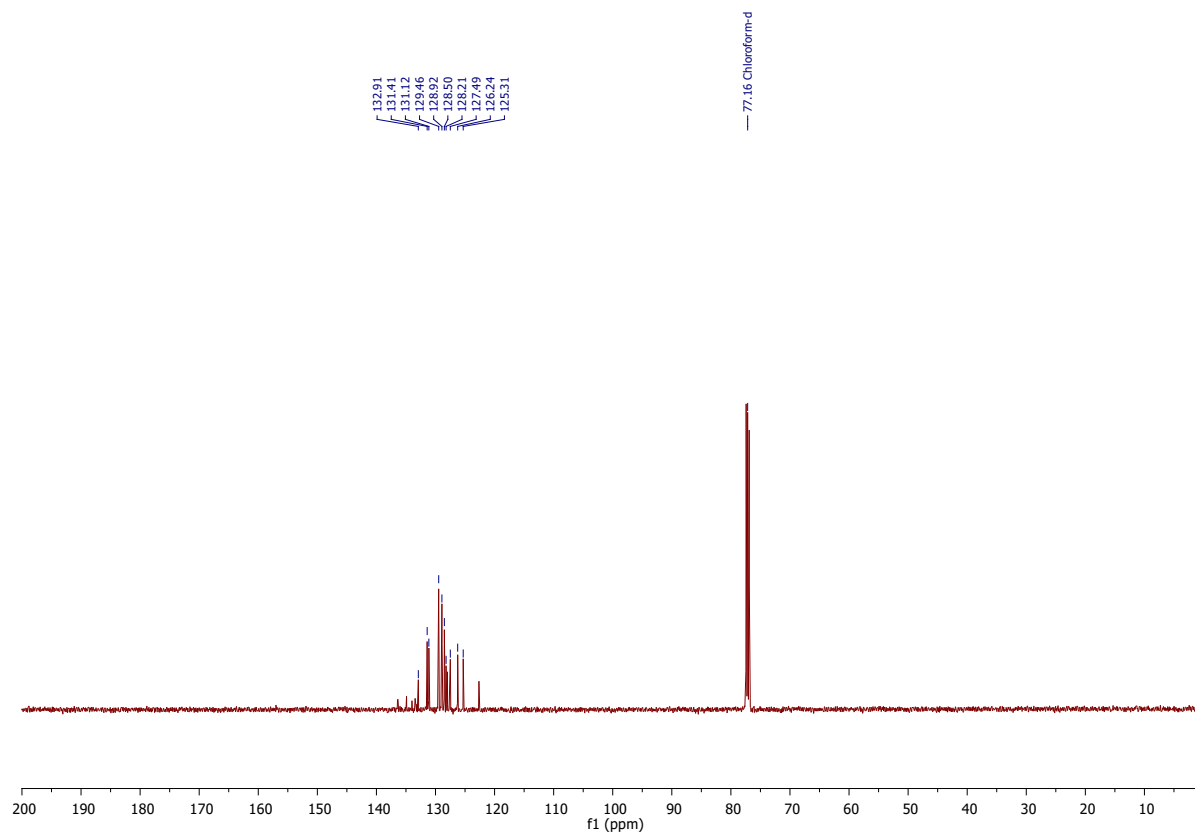

**(9) (S-styryl)furane-2-carbothioate:**

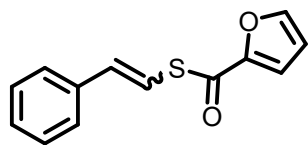



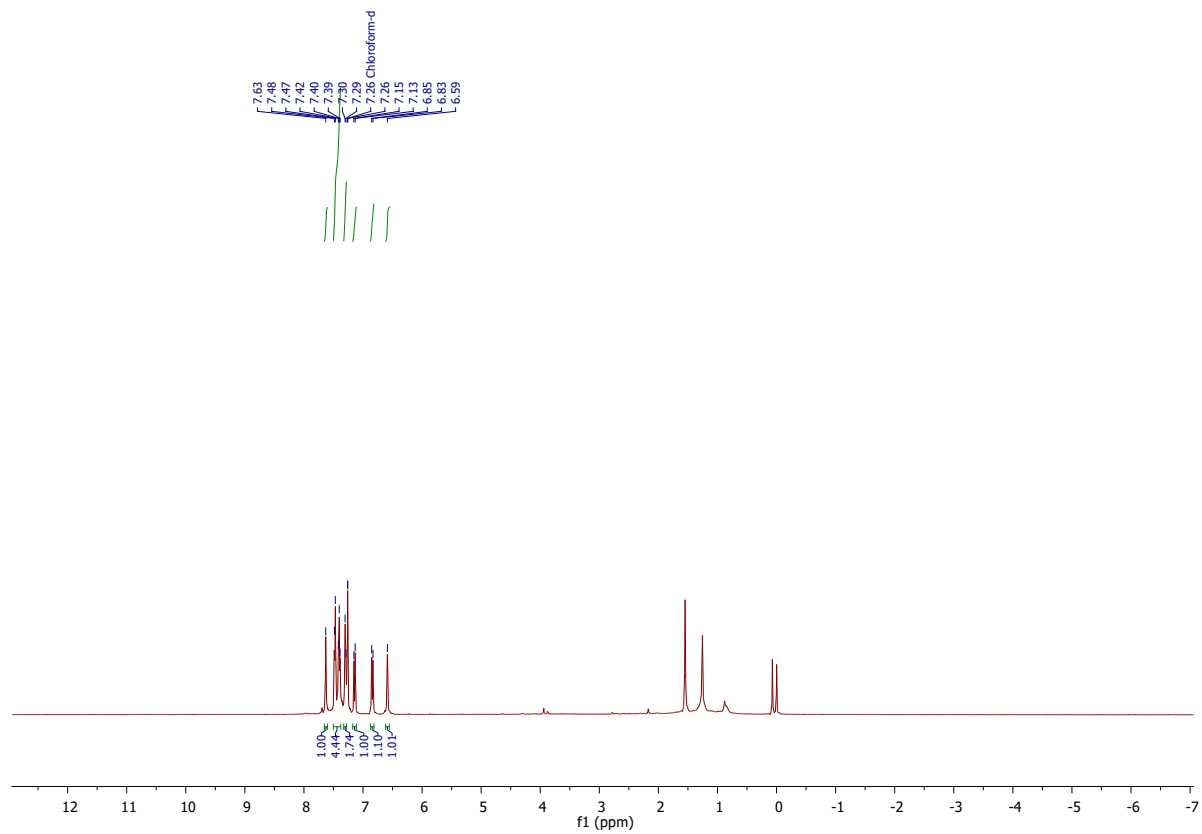

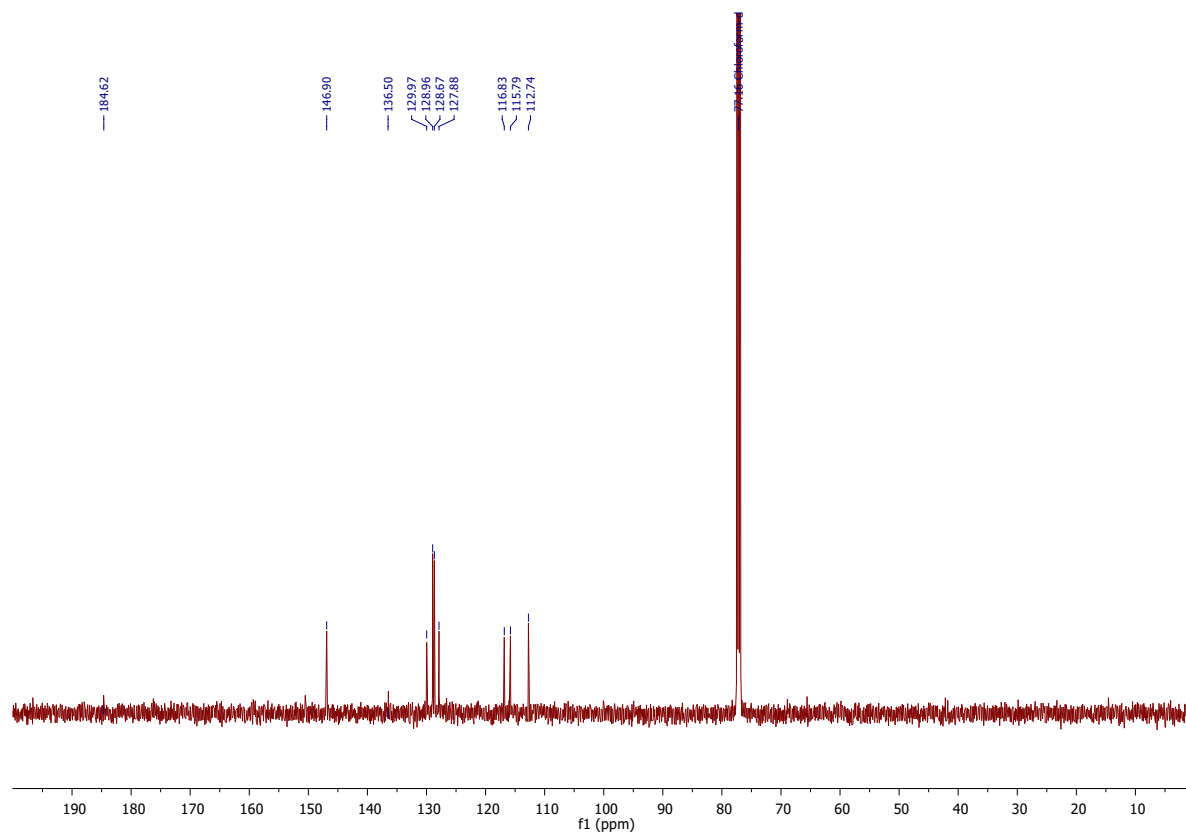

**Figure SI 7.**  $^1\text{H}$  and  $^{13}\text{C}$  spectra of catalytic products.

**X-ray Crystallography:**

X-ray intensity data of 42833 reflections (of which 7431 unique) for **1**, 12813 reflections (of which 3907 unique) for **2**, and 15943 reflections (of which 6944 unique) for **3** were collected at 293(2) K. The cell dimensions were determined by the least-squares fit method. The intensities were measured by  $\phi$  and  $\omega$  scan mode for ranges 2.241 to 25.999° for **1**, 2.081 to 21.202° for **2**, 3.467 to 29.062 ° for **3**. 6101, 2686 and 4806 for **1**, **2** and **3** reflections were treated as observed [ $I > 2\sigma(I)$ ] respectively. Scan width for data collection was 1° for all, while the exposure times were 11.2, 7.6 and 8.3 sec. for **1**, **2** and **3**, respectively. Although, we used the best available crystal for data collection, we could not grow a good quality crystal of **2** even after several attempts. Thus, the observed intensities in the case of **2** were very weak due to poor crystal quality (Fig. SI. 8 – SI. 9).

Data were corrected for Lorentz and polarization factors. All the hydrogen atoms were geometrically fixed and allowed to ride on their parent carbon atoms. The final refinement cycles converged to an  $R = 0.0327$  and  $wR (F2) = 0.0748$  for **1**,  $R = 0.0752$  and  $wR (F2) = 0.1828$  for **2** and  $R = 0.0458$  and  $wR (F2) = 0.0986$  for **3**. Although, the  $R$ ,  $wR$  and  $GoF$  values in the case of **2** are satisfactory there was some residual density near S1 which is not much expected, however, the value was not very high (1.38) and can be fully adjusted with a H atom only. No trace of any other atom (even with partial occupancy) in the residual density map was observable (Fig. SI. 10). When we placed a H atom on S1 the refined S1-H distance becomes 1.10 Å. However, under such a situation, the charge on Cu(1) needs some other anion to be balanced. As mentioned, already, there is no other anion present. Notably, NMR spectrum is also consistent with the deprotonated ligand bound to Cu(I). Under such circumstances, the only possibility is the appearance of diffraction ripples. Such diffraction ripples are commonly observed near heavy atoms. Although S1 is not the heaviest atom present, however, from the residual peak pairs (Q1 and Q3) it seems that these are also diffraction ripples.

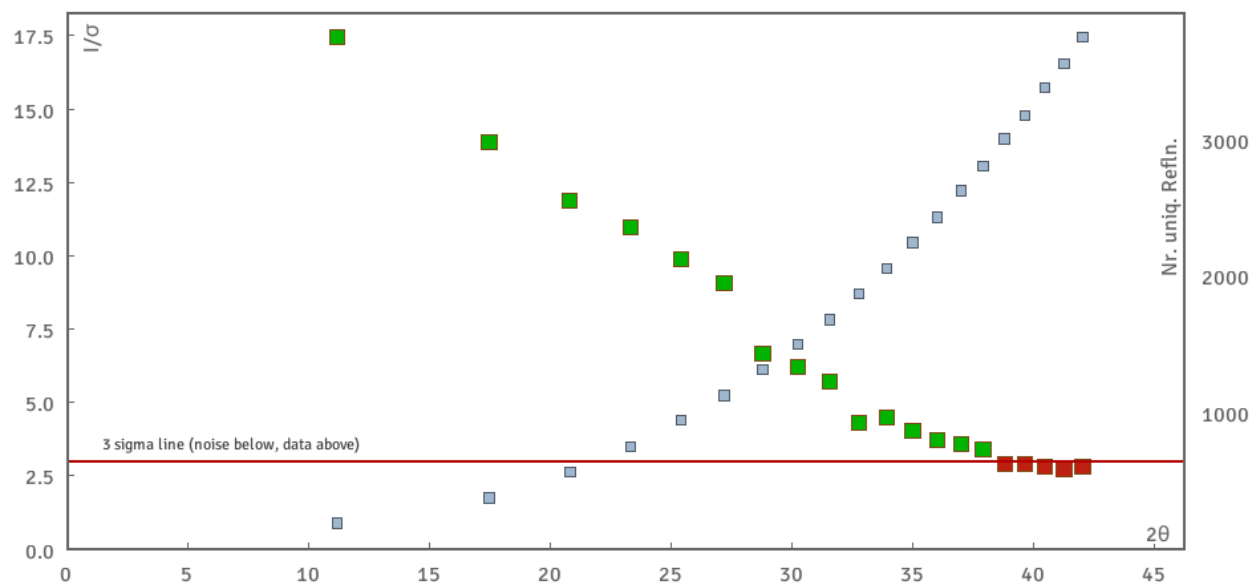Fig. SI. 8 Plot of  $I/\sigma$  versus resolution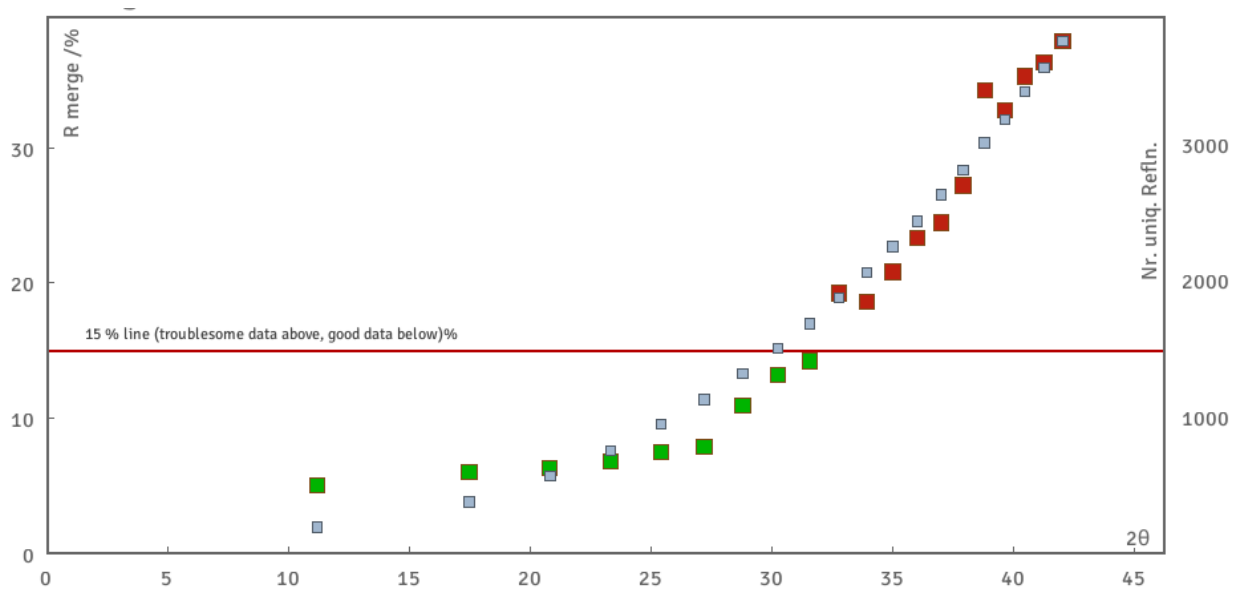Fig. SI. 9 Plot of  $R_{\text{merge}}$  versus resolution

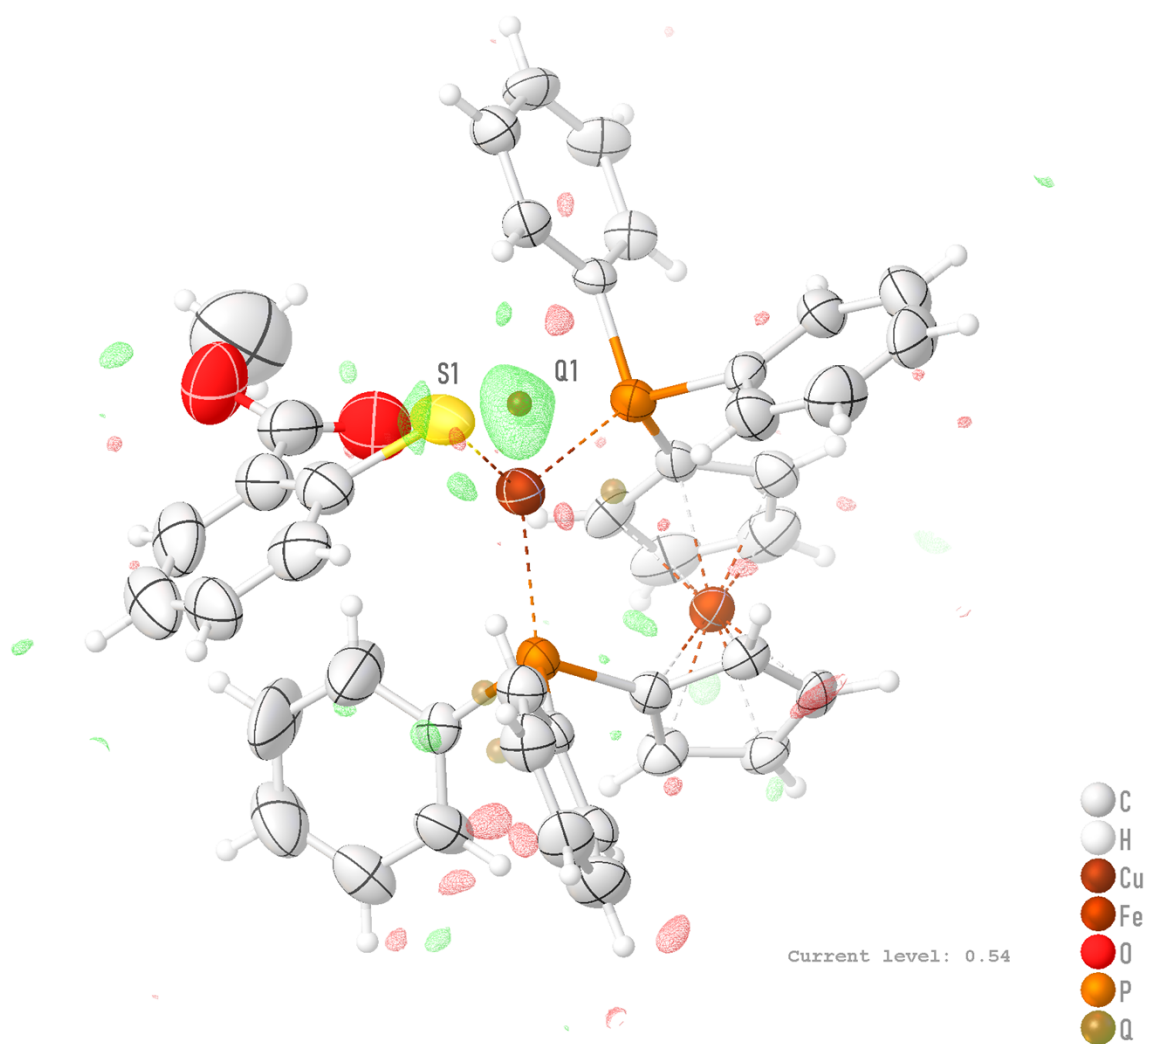

Fig. SI. 10 Molecular structure and residual electron density
